# Supplementary material for: Pathogen spectrum and immunotherapy in patients with anti-IFN-γ autoantibodies: A multicenter retrospective study and systematic review
Source: PubMed Central journal article supplement (PMC9772057; doi:10.3389/fimmu.2022.1051673), 2022-12-08
Supplement: DataSheet_1.pdf [file DataSheet_1.pdf]

| ID | References             | Patient | Age   | Sex (M/F) | Geographic        | Infection                                                                                                                             |                                                                                                                                                                                                                   | AIGA titer                           | Diagnosis for AIGA positive | Neutralization activity                                   | immunotherapy                                      | AIGA titer change | Organs involvement                                                                                                                                                | Outcome    |
|----|------------------------|---------|-------|-----------|-------------------|---------------------------------------------------------------------------------------------------------------------------------------|-------------------------------------------------------------------------------------------------------------------------------------------------------------------------------------------------------------------|--------------------------------------|-----------------------------|-----------------------------------------------------------|----------------------------------------------------|-------------------|-------------------------------------------------------------------------------------------------------------------------------------------------------------------|------------|
| 1  | Doffinger, 2004 [1]    | 1       | 47    | M(1)      | Philippines (1)   | M.tuberculosis(1)<br>M.chelonae(1)<br>Candida spp(1)<br>CMV (1)                                                                       | Rifampin, isoniazid, pyrazinamide, ethambutol for M.tuberculosis and cured. Ganciclovir for CMV. Isoniazid, pyrazinamide, ethambutol, amikacin, doxycycline, clarithromycin for M.chelonae. Persistent infection. | —                                    | AIGA positive               | Inhibited TNF- $\alpha$ production                        | Recombinant IFN- $\gamma$                          | No decrease       | Lymph nodes (1)<br>Lung (1)<br>Liver (1)<br>Abdominal cavity (1)<br>Pericardium (1)<br>Spleen (1)<br>Pleural cavity (1)<br>Bone marrow(1)<br>Skin(1)              | Death      |
| 2  | Höflich C, 2004 [2]    | 1       | 25    | F(1)      | Thailand(1)       | M. chelonae (1)<br>B. cocovenenans (1)<br>E. faecalis (1)<br>Candida spp. (1)                                                         | Antibiotic therapy for 6 months. B. cocovenenans was Relapse. Deteriorated.                                                                                                                                       | —                                    | AIGA positive               | Inhibited TNF- $\alpha$ production and HLA-DR expression. | None                                               | —                 | Lymph nodes (1)<br>Lung (1)<br>Tonsils (1)<br>Spleen (1)<br>Liver (1)<br>Brain tissue (1)<br>Bone (1)<br>Bone marrow (1)<br>Skin (1)<br>Soft tissue (1)           | Death      |
| 3  | Kampmann B, 2005 [3]   | 3       | 46(1) | F(1)      | United Kingdom(1) | M. avium intracellulare (1)                                                                                                           | Rifabutin, clarithromycin, ethambutol, and clofazimine for M. avium intracellulare for 42 months. Deteriorate.                                                                                                    | High ODs were detected (mean, 0.334) | AIGA positive               | Inhibited TNF- $\alpha$ production                        | Recombinant IFN- $\gamma$                          | No decrease       | Lymph nodes (1)<br>Joint(1)<br>Bone(1)<br>Soft tissue(1)<br>Lung(1)                                                                                               | Remission  |
|    |                        |         | 32(1) | M(1)      | United Kingdom(1) | M. avium intracellulare (1)                                                                                                           | Clarithromycin, rifabutin, and ethambutol. Improved.                                                                                                                                                              |                                      |                             |                                                           | None                                               | —                 | Bone(1)                                                                                                                                                           | Remission  |
|    |                        |         | 59(1) | F(1)      | United Kingdom(1) | M. fortuitum (1)<br>Aspergillus spp (1)<br>EBV(2)                                                                                     | Treatment with nontuberculous mycobacterial drugs and amphotericin.                                                                                                                                               |                                      |                             |                                                           | None                                               | —                 | Lung(1)                                                                                                                                                           | Remission  |
| 4  | Patel SY, 2005[4]      | 6       | 43    | F(1)      | China             | M. avium complex (1)                                                                                                                  | Treatment with anti-NTM drugs for 5 years                                                                                                                                                                         | —                                    | AIGA positive               | —                                                         | None                                               | —                 | Bone (1)<br>Lung (1)<br>Skin (1)<br>Soft tissue (1)<br>Knee (1)                                                                                                   | Remission  |
|    |                        |         | 45    | F(1)      | Philippines (1)   | M. avium complex (1)<br>M. chelonae (1)                                                                                               | Treatment with anti-NTM drugs more than 5 years                                                                                                                                                                   | —                                    | AIGA positive               |                                                           | None                                               | —                 | Lymph nodes (1)<br>Lung (1)<br>Skin (1)                                                                                                                           | Persistent |
|    |                        |         | 52    | F(1)      | Thailand(1)       | M. tuberculosis (1)<br>M. szulgai (1)<br>M. kansasii (1)<br>M. scrofulaceum (1)                                                       | Treatment with anti-NTM drugs more than 5 years                                                                                                                                                                   | —                                    | AIGA positive               |                                                           | None                                               | —                 | Lymph nodes (1)<br>Lung (1)<br>Skin (1)<br>Bone (1)                                                                                                               | Persistent |
|    |                        |         | 40    | F(1)      | Philippines (1)   | M. abscessus (1)<br>M. fortuitum (1)<br>M. avium complex (1)                                                                          | Treatment with anti-NTM drugs more than 5 years                                                                                                                                                                   | —                                    | AIGA positive               |                                                           | None                                               | —                 | Lymph nodes (1)<br>Lung (1)                                                                                                                                       | Persistent |
|    |                        |         | 66    | F(1)      | Philippines (1)   | M. abscessus (1)<br>M. avium (1)<br>HCV(1)<br>Pseudomonas aeruginosa (1)<br>Enterococcus cloacae (1)<br>Achromobacter xylooxidans (1) | Treatment with anti-NTM drugs                                                                                                                                                                                     | —                                    | AIGA positive               |                                                           | None                                               | —                 | Lymph nodes (1)<br>Lung (1)                                                                                                                                       | Persistent |
|    |                        |         | 31    | F(1)      | Philippines (1)   | M. avium complex (1)<br>VZV (1)                                                                                                       | Treatment with anti-NTM drugs more than 2.5 years                                                                                                                                                                 | —                                    | AIGA positive               |                                                           | None                                               | —                 | Appendix (1)<br>Bone (1)<br>Skin (1)<br>Pharynx (1)                                                                                                               | Persistent |
| 5  | Tanaka Y, 2007[5]      | 1       | 54    | M(1)      | Japan (1)         | M. avium complex (1)<br>Streptococcus pyogene (1)                                                                                     | Sulbactam/ampicillin for Streptococcus pyogene<br>Clarithromycin, ethambutol, streptomycin for M. avium complex                                                                                                   | —                                    | AIGA positive               | Inhibited IFN- $\gamma$ production                        | None                                               | —                 | Lung (1)<br>Bone (1)<br>Lymph nodes (1)<br>Gastrointestinal tract (1)<br>Bone marrow (1)<br>Pleural cavity (1)<br>Spleen (1)<br>Liver (1)<br>Abdominal cavity (1) | Remission  |
| 6  | Koya T, 2009 [6]       | 1       | 44    | F(1)      | Japan (1)         | M. avium complex (1)                                                                                                                  | Rifampicin, streptomycin, ethambutol, and clarithromycin for M. avium complex. Deteriorated.                                                                                                                      | —                                    | AIGA positive               | —                                                         | Intravenous immunoglobulin                         | No decrease       | Soft tissue (1)<br>Bone (1)                                                                                                                                       | Remission  |
| 7  | Baerlecken N, 2009 [7] | 1       | 38    | F(1)      | Philippines (1)   | M. avium intercellulare (1)                                                                                                           | Rifabutin, ethambutol, and azithromycin                                                                                                                                                                           | —                                    | AIGA positive               | Inhibited IFN $\gamma$ production and MHC-I expression    | Plasmapheresis<br>Cyclophosphamide<br>Prednisolone | Decrease          | Lung (1)<br>Bone (1)<br>Liver (1)<br>Spine (1)<br>Blood (1)                                                                                                       | Remission  |

|    |                      |    |       |                   |                 |                                                                                                          |                                                                                                                                                                                     |                                                                                                   |               |                                           |           |                |                                                                                               |               |
|----|----------------------|----|-------|-------------------|-----------------|----------------------------------------------------------------------------------------------------------|-------------------------------------------------------------------------------------------------------------------------------------------------------------------------------------|---------------------------------------------------------------------------------------------------|---------------|-------------------------------------------|-----------|----------------|-----------------------------------------------------------------------------------------------|---------------|
| 8  | Tang BS, 2010 [8]    | 8  | 42    | F(1)              | China (1)       | M. chelonae (1)<br>M. kansasii (1)<br>T. marneffeii (1)<br>B. pseudomallei (1)                           | Imipenem, amikacin and tigecycline for NTM. Relapse. Itraconazole for T. marneffeii,                                                                                                | OD value: 2.649                                                                                   | AIGA positive | —                                         | None      | —              | Lymph nodes (1)<br>Liver (1)<br>Spleen (1)<br>Joint (1)                                       | Relapse       |
|    |                      |    | 45    | F(1)              | China (1)       | T. marneffeii (1)<br>M. avium intercellulare (1)<br>M. fortuitum (1)<br>HBV (1)                          | Isoniazid, ethambutol, clarithromycin, ofloxacin, amikacin and levofloxacin for M. fortuitum<br>Amphotericin B, itraconazole for T. marneffeii .                                    | OD value: 2.814                                                                                   | AIGA positive | —                                         | None      | —              | Lung (1)<br>Lymph nodes (1)<br>Bone (1)<br>Bone marrow (1)                                    | Relapse       |
|    |                      |    | 39    | F(1)              | China (1)       | T. marneffeii (1)<br>M. kansasii (1)<br>Salmonella enterica (1)                                          | Cefoperazone/sulbactam, ampicillin for Salmonella enterica.<br>Azithromycin, rifampin, and levofloxacin for M. kansasii                                                             | OD value: 1.319                                                                                   | AIGA positive | —                                         | None      | —              | Lung (1)<br>Lymph nodes (1)<br>Bone (1)                                                       | Not mentioned |
|    |                      |    | 67    | F(1)              | China (1)       | T. marneffeii (1)<br>M. avium intercellulare (1)<br>B. pseudomallei (1)                                  | —                                                                                                                                                                                   | OD value: 2.809                                                                                   | AIGA positive | —                                         | None      | —              | Bone (1)<br>Bone marrow (1)                                                                   | Not mentioned |
|    |                      |    | 53    | M(1)              | China (1)       | T. marneffeii (1)<br>M. chelonae (1)<br>Non-typhoidal salmonellosis (1)<br>B. pseudomallei (1)           | —                                                                                                                                                                                   | OD value: 2.593                                                                                   | AIGA positive | —                                         | None      | —              | Lymph nodes (1)                                                                               | Not mentioned |
|    |                      |    | 49    | M(1)              | China (1)       | T. marneffeii (1)<br>Salmonella spp (1)<br>B. pseudomallei (1)                                           | —                                                                                                                                                                                   | OD value: 2.9                                                                                     | AIGA positive | —                                         | None      | —              | Lung (1)<br>Lymph nodes (1)                                                                   | Not mentioned |
|    |                      |    | 87    | M(1)              | China (1)       | T. marneffeii (1)<br>M. avium intercellulare (1)<br>Salmonella spp (1)<br>B. pseudomallei (1)<br>HBV (1) | —                                                                                                                                                                                   | OD value: 0.959                                                                                   | AIGA positive | —                                         | None      | —              | Bone (1)<br>Lymph nodes (1)                                                                   | Not mentioned |
|    |                      |    | 54    | M(1)              | China (1)       | T. marneffeii (1)<br>M. chelonae (1)<br>Salmonella spp (1)<br>HBV (1)                                    | —                                                                                                                                                                                   | OD value: 1.358                                                                                   | AIGA positive | —                                         | None      | —              | Lymph nodes (1)<br>Pericardial (1)<br>Pleural cavity (1)                                      | Not mentioned |
| 9  | Kampitak T, 2011 [9] | 3  | 56    | M(1)              | Thailand(1)     | T. marneffeii (1)<br>M. intermedium (1)<br>M. tuberculosis (1)                                           | Isoniazid, rifampin, pyrazinamide, Moxifloxacin and ethambutol for M. intermedium. Itraconazole for T. marneffeii.                                                                  | Positive (high titer)                                                                             | AIGA positive | Inhibitory activity against IFN- $\gamma$ | None      | —              | Lymph nodes (1)<br>Lung (1)<br>Skin (1)<br>Bone marrow (1)                                    | Relapse       |
|    |                      |    | 45    | M(1)              | Thailand(1)     | Salmonella spp (1)<br>M. tuberculosis (1)<br>VZV (1)<br>M.abscessus (1)                                  | Ceftriaxone, isoniazid, rifampin, pyrazinamide and ethambutol for tuberculosis and salmonellosis.<br>Salmonellosis was relapse.                                                     | Positive (high titer)                                                                             | AIGA positive | Inhibitory activity against IFN- $\gamma$ | None      | —              | Lymph nodes (1)<br>Lung (1)<br>Skin (1)<br>Bone marrow (1)<br>Pleural cavity (1)<br>Liver (1) | Relapse       |
|    |                      |    | 39    | M(1)              | Thailand(1)     | Salmonella spp (1)<br>M. abscessus (1)<br>M. tuberculosis (1)                                            | Isoniazid, rifampicin, pyrazinamide, ethambutol and clarithromycin for TB and NTM infection, ciprofloxacin for salmonellosis.                                                       | Positive (high titer)                                                                             | AIGA positive | Inhibitory activity against IFN- $\gamma$ | None      | —              | Lymph nodes (1)<br>Skin (1)<br>Bone (1)<br>Abdomen (1)                                        | Persistent    |
| 10 | Browne SK, 2012 [10] | 78 | —     | Thailand<br>China | —               | —                                                                                                        | —                                                                                                                                                                                   | —                                                                                                 | —             | —                                         | —         | —              | —                                                                                             |               |
| 11 | Browne SK, 2012 [11] | 4  | 46(1) | F(1)              | Philippines (1) | M. abscessus (1)<br>M. avium complex (1)                                                                 | Clarithromycin, ethambutol, isoniazid, linezolid, moxifloxacin, tigecycline for anti-NTM, Relapsed twice                                                                            | —                                                                                                 | AIGA positive | Inhibited pSTAT-1                         | Rituximab | 80% decrease   | Lymph nodes (1)<br>Skin (1)<br>Blood (1)<br>Urine (1)<br>Pelvic (1)                           | Remission     |
|    |                      |    | 69    | F(1)              | Philippines (1) | M. abscessus (1)                                                                                         | Amikacin, amoxicillin/clavulanate, azithromycin, ciprofloxacin, ertapenem, ethambutol, isoniazid, linezolid, meropenem, pyrazinamide, rifampin, tigecycline for NTM. Relapsed twice | —                                                                                                 | AIGA positive | Inhibited pSTAT-1                         | Rituximab | 73.7% decrease | Lymph nodes (1)<br>Blood (1)<br>Bone (1)                                                      | Remission     |
|    |                      |    | 50    | F(1)              | Laos (1)        | M. avium (1)                                                                                             | Clarithromycin, Ethambutol, Moxifloxacin for anti-NTM, Relapsed twice.                                                                                                              | —                                                                                                 | AIGA positive | Inhibited pSTAT-1                         | Rituximab | 65% decrease   | Lymph nodes (1)<br>Muscle (1)<br>Bone (1)                                                     | Remission     |
|    |                      |    | 60    | F(1)              | Vietnam (1)     | M. intracellulare (1)                                                                                    | Amikacin, azithromycin, clarithromycin, ethambutol, isoniazid, levofloxacin, moxifloxacin, pyrazinamide, rifampin for NTM.                                                          | —                                                                                                 | AIGA positive | Inhibited pSTAT-1                         | Rituximab | Decrease 58%   | Skin (1)<br>Muscle (1)<br>Bone (1)                                                            | Remission     |
| 12 | Picque JB, 2012 [12] | 1  | 45    | F(1)              | Thailand (1)    | M. scrofulaceum (1)<br>M. avium (1)<br>T. marneffeii (1)                                                 | Amphotericin B and Itraconazole for T. marneffeii.<br>Azithromycin, rifampin, ethambutol, moxifloxacin, amikacin for M. scrofulaceum.                                               | —                                                                                                 | AIGA positive | —                                         | None      | —              | Lymph nodes (1)<br>Lung (1)<br>Bone (1)<br>Blood (1)<br>Pleural cavity (1)                    | Persistent    |
| 13 | Tanaka H, 2013[13]   | 1  | 64    | F(1)              | Japan (1)       | M. avium (1)<br>Mycobac terium intracellulare (1)<br>Measles virus (1)<br>VZV (1)                        | Clarithromycin, rifampicin, and ethambutol for NTM.                                                                                                                                 | 10,000-fold titer of anti-IFN- $\gamma$ antibody compared with controls and other disease groups. | AIGA positive | —                                         | None      | —              | Bone (1)<br>Lung (1)<br>Skin (1)<br>Urinary bladder (1)<br>Uterus (1)                         | Relapse       |

|    |                        |           |                                                                                                                                                                                                                                                                                                                                          |               |              |                                                                                                                                                                                                                                                                                 |                                                                                                           |                                                                                   |               |                                                    |            |   |                                                                                            |               |
|----|------------------------|-----------|------------------------------------------------------------------------------------------------------------------------------------------------------------------------------------------------------------------------------------------------------------------------------------------------------------------------------------------|---------------|--------------|---------------------------------------------------------------------------------------------------------------------------------------------------------------------------------------------------------------------------------------------------------------------------------|-----------------------------------------------------------------------------------------------------------|-----------------------------------------------------------------------------------|---------------|----------------------------------------------------|------------|---|--------------------------------------------------------------------------------------------|---------------|
| 14 | Nei T, 2012 [14]       | 1         | 53                                                                                                                                                                                                                                                                                                                                       | M(1)          | Japan (1)    | M. kansasii (1)                                                                                                                                                                                                                                                                 | Isoniazid, rifampicin and ethambutol for M. kansasii                                                      | —                                                                                 | AIGA positive | Inhibited TNF- $\alpha$ production                 | None       | — | Bone (1)<br>Lung (1)<br>Lymph nodes (1)<br>Liver (1)<br>Spleen (1)<br>Bone marrow (1)      | Death         |
| 15 | Chi CY, 2013 [15]      | 17        | 55                                                                                                                                                                                                                                                                                                                                       | M(1)          | China (1)    | M. abscessus (1)<br>S. enteritidis (1)<br>T. marneffeii (1)<br>Salmonella spp (1)<br>VZV (1)                                                                                                                                                                                    | —                                                                                                         | —                                                                                 | AIGA positive | Inhibited IL-12 production                         | None       | — | Lymph nodes (1)<br>Bone (1)                                                                | Remission     |
|    |                        |           | 51                                                                                                                                                                                                                                                                                                                                       | F(1)          | China (1)    | M. scrofulaceum (1)<br>VZV (1)                                                                                                                                                                                                                                                  | —                                                                                                         | —                                                                                 | AIGA positive | Inhibited IL-12 production                         | None       | — | Lymph nodes (1)<br>Bone (1)<br>Skin (1)                                                    | Persistent    |
|    |                        |           | 69                                                                                                                                                                                                                                                                                                                                       | M(1)          | China (1)    | M. avium complex (1)<br>S enteritidis (1)<br>Salmonella spp (1)<br>VZV (1)                                                                                                                                                                                                      | —                                                                                                         | —                                                                                 | AIGA positive | Inhibited IL-12 production                         | None       | — | Lymph nodes (1)<br>Bone(1)                                                                 | Persistent    |
|    |                        |           | 47                                                                                                                                                                                                                                                                                                                                       | F(1)          | China (1)    | S enteritidis (1)<br>M. gordonae (1)<br>Salmonella spp (1)<br>VZV (1)                                                                                                                                                                                                           | —                                                                                                         | —                                                                                 | AIGA positive | Inhibited IL-12 production                         | None       | — | Lymph nodes (1)<br>Bone(1)                                                                 | Persistent    |
|    |                        |           | 55                                                                                                                                                                                                                                                                                                                                       | M(1)          | China (1)    | M. terrae (1)                                                                                                                                                                                                                                                                   | —                                                                                                         | —                                                                                 | AIGA positive | Inhibited IL-12 production                         | None       | — | Muscles (1)<br>Bone (1)                                                                    | Remission     |
|    |                        |           | 81                                                                                                                                                                                                                                                                                                                                       | M(1)          | China (1)    | NTM(1)                                                                                                                                                                                                                                                                          | —                                                                                                         | —                                                                                 | AIGA positive | Inhibited IL-12 production                         | None       | — | Lymph nodes (1)<br>Skin (1)                                                                | Persistent    |
|    |                        |           | 66                                                                                                                                                                                                                                                                                                                                       | M(1)          | China (1)    | NTM(1)                                                                                                                                                                                                                                                                          | —                                                                                                         | —                                                                                 | AIGA positive | Inhibited IL-12 production                         | None       | — | Lymph nodes (1)<br>Lung(1)                                                                 | Remission     |
|    |                        |           | 87                                                                                                                                                                                                                                                                                                                                       | M(1)          | China (1)    | M. scrofulaceum(1)<br>S aureus (1)<br>VZV (1)                                                                                                                                                                                                                                   | —                                                                                                         | —                                                                                 | AIGA positive | Inhibited IL-12 production                         | None       | — | Lymph nodes (1)<br>Skin (1)<br>Bone (1)                                                    | Remission     |
|    |                        |           | 48                                                                                                                                                                                                                                                                                                                                       | M(1)          | China (1)    | M. avium complex (1)<br>S enteritidis (1)<br>VZV (1)                                                                                                                                                                                                                            | —                                                                                                         | —                                                                                 | AIGA positive | Inhibited IL-12 production                         | None       | — | Lymph nodes (1)<br>Lung (1)<br>Bone (1)                                                    | Remission     |
|    |                        |           | 61                                                                                                                                                                                                                                                                                                                                       | F(1)          | China (1)    | NTM (1)<br>VZV (1)                                                                                                                                                                                                                                                              | —                                                                                                         | —                                                                                 | AIGA positive | Inhibited IL-12 production                         | None       | — | Lymph nodes (1)<br>Skin(1)<br>Bone (1)                                                     | Persistent    |
|    |                        |           | 49                                                                                                                                                                                                                                                                                                                                       | M(1)          | China (1)    | M. kansasii (1)<br>VZV (1)                                                                                                                                                                                                                                                      | —                                                                                                         | —                                                                                 | AIGA positive | Inhibited IL-12 production                         | None       | — | Lymph nodes (1)<br>Lung (1)                                                                | Persistent    |
|    |                        |           | 56                                                                                                                                                                                                                                                                                                                                       | F(1)          | China (1)    | NTM (1)<br>VZV (1)                                                                                                                                                                                                                                                              | —                                                                                                         | —                                                                                 | AIGA positive | Inhibited IL-12 production                         | None       | — | Lymph nodes (1)<br>Skin (1)<br>Bone (1)                                                    | Persistent    |
|    |                        |           | 46                                                                                                                                                                                                                                                                                                                                       | F(1)          | China (1)    | NTM (1)<br>S. enteritidis (1)                                                                                                                                                                                                                                                   | —                                                                                                         | —                                                                                 | AIGA positive | Inhibited IL-12 production                         | None       | — | Lymph nodes (1)<br>Lung (1)                                                                | Persistent    |
|    |                        |           | 72                                                                                                                                                                                                                                                                                                                                       | F(1)          | China (1)    | M. avium complex(1)                                                                                                                                                                                                                                                             | —                                                                                                         | —                                                                                 | AIGA positive | Inhibited IL-12 production                         | None       | — | Bone (1)<br>Lung (1)                                                                       | Death         |
|    |                        |           | 49                                                                                                                                                                                                                                                                                                                                       | F(1)          | China (1)    | NTM (1)<br>Legionellosis (1)<br>T. marneffeii(1)                                                                                                                                                                                                                                | —                                                                                                         | —                                                                                 | AIGA positive | Inhibited IL-12 production                         | None       | — | Lung (1)<br>Lymph nodes (1)<br>Pericardium (1)<br>Bone (1)                                 | Lost          |
| 47 | F(1)                   | China (1) | NTM (1)<br>S. enteritidis(1)                                                                                                                                                                                                                                                                                                             | —             | —            | AIGA positive                                                                                                                                                                                                                                                                   | Inhibited IL-12 production                                                                                | None                                                                              | —             | Lung(1)<br>Lymph nodes (1)<br>Skin (1)<br>Bone (1) | Persistent |   |                                                                                            |               |
| 76 | M(1)                   | China (1) | M. abscessus (1)<br>M. chelonae (1)<br>M. chelonae(3)<br>M. abscessus(4)<br>M. chelonae-abscessus complex (3)<br>M. fortuitum (1)<br>M. avium (3)<br>M. avium/paratuberculosis/solitarium (1)<br>M. kansasii (3)<br>NTM Species not specified (6)<br>T. marneffeii (12)<br>Cryptococcosis(1)<br>Histoplasmosis (1)<br>Salmonella spp (8) | —             | —            | AIGA positive                                                                                                                                                                                                                                                                   | Inhibited IL-12 production                                                                                | None                                                                              | —             | Lung (1)<br>Lymph nodes (1)                        | Persistent |   |                                                                                            |               |
| 16 | Wongkulab P, 2013 [16] | 20        | mean 48                                                                                                                                                                                                                                                                                                                                  | F(11)<br>M(9) | Thailand(20) | M. abscessus(4)<br>M. chelonae-abscessus complex (3)<br>M. fortuitum (1)<br>M. avium (3)<br>M. avium/paratuberculosis/solitarium (1)<br>M. kansasii (3)<br>NTM Species not specified (6)<br>T. marneffeii (12)<br>Cryptococcosis(1)<br>Histoplasmosis (1)<br>Salmonella spp (8) | —                                                                                                         | Mean concentrations of autoantibody to IFN- $\gamma$ were 2.4606 $\pm$ 1.309 O.D. | AIGA positive | Inhibitory activity against IFN- $\gamma$          | None       | — | Lymph nodes (15)<br>Skin (14)<br>Blood (11)<br>Lung(5)<br>Bone and joint (4)<br>Others (2) | Not mentioned |
| 17 | Ishii T, 2013 [17]     | 1         | 66                                                                                                                                                                                                                                                                                                                                       | M(1)          | Japan (1)    | M. aviumcomplex (1)<br>HCV (1)                                                                                                                                                                                                                                                  | Rifampicin, ethambutol, clarithromycin, amikacin, levofloxacin hydrate, moxifloxacin for M. aviumcomplex. | —                                                                                 | AIGA positive | —                                                  | None       | — | Lung(1)<br>Lymph nodes (1)<br>Bone (1)                                                     | Remission     |

|    |                            |             |                                                               |                                                                                    |                 |                                                                                                 |                                                                                                           |                              |               |                                                                                       |            |   |                                                                                |            |
|----|----------------------------|-------------|---------------------------------------------------------------|------------------------------------------------------------------------------------|-----------------|-------------------------------------------------------------------------------------------------|-----------------------------------------------------------------------------------------------------------|------------------------------|---------------|---------------------------------------------------------------------------------------|------------|---|--------------------------------------------------------------------------------|------------|
| 18 | Poulin S, 2013 [18]        | 1           | 49                                                            | F(1)                                                                               | Laos(1)         | M. colombiense (1)<br>M. cytomegalovirus (1)<br>P. aeruginosa (1)                               | —                                                                                                         | —                            | AIGA positive | —                                                                                     | None       | — | Lung(1)<br>Lymph nodes (1)                                                     | Death      |
| 19 | Chan JF, 2013 [19]         | 3           | 57                                                            | M(1)                                                                               | China (1)       | M. chelonae (1)<br>T. marneffeii (1)<br>Salmonella spp(1)<br>VZV (1)                            | Azithromycin, ceftazidime, vancomycin, itraconazole, imipenem/cilastatin, clarithromycin                  | —                            | AIGA positive | —                                                                                     | None       | — | Skin(1)<br>Lymph nodes (1)                                                     | Remission  |
|    |                            |             | 42                                                            | F(1)                                                                               | China (1)       | M. chelonae (1)<br>M. Kansasii (1)<br>T. marneffeii (1)<br>Burkholderia pseudomallei(1)         | Imipenem/cilastatin, amikacin and clarithromycin                                                          | —                            | AIGA positive | —                                                                                     | None       | — | Skin(1)<br>Lymph nodes (1)<br>Spleen (1)<br>Joint (1)                          | Remission  |
|    |                            |             | 47                                                            | F(1)                                                                               | China (1)       | M. chelonae (1)<br>VZV (1)                                                                      | Imipenem/cilastatin, amikacin and clarithromycin                                                          | —                            | AIGA positive | —                                                                                     | None       | — | Skin(1)<br>Lymph nodes (1)                                                     | Relapse    |
| 20 | Chan JF, 2013 [20]         | 1           | 34                                                            | F(1)                                                                               | China (1)       | M. chelonae (1)<br>HBV (1)                                                                      | Imipenem-cilastatin, amikacin, clarithromycin                                                             | —                            | AIGA positive | —                                                                                     | None       | — | Skin(1)<br>Lymph nodes (1)<br>Lung (1)                                         | Remission  |
| 21 | Chetchotisakd P, 2014 [21] | 16          | 53                                                            | F(1)                                                                               | Thailand(1)     | Slow grower NTM                                                                                 | Isoniazid, regimen, ethambutol, clarithromycin, ofloxacin, amikacin, azithromycin, linezolid              | —                            | Not detected  | —                                                                                     | None       | — | Skin(1)<br>Lymph nodes (1)<br>Spleen (1)<br>Lung (1)<br>Liver (1)<br>Blood (1) | Death      |
|    |                            |             | 47                                                            | F(1)                                                                               | Thailand(1)     | Cryptococcosis (1)<br>M. abscessus(1)                                                           | Ethambutol, clarithromycin, rifampicin, imipenem, linezolid                                               | —                            | AIGA positive | —                                                                                     | None       | — | Lymph nodes (1)<br>Bone (1)                                                    | Relapse    |
|    |                            |             | 61                                                            | M(1)                                                                               | Thailand(1)     | M. abscessus(1)                                                                                 | Clarithromycin, amikacin, ciprofloxacin, linezolid                                                        | —                            | AIGA positive | —                                                                                     | None       | — | Lymph nodes (1)                                                                | Remission  |
|    |                            |             | 15                                                            | F(1)                                                                               | Thailand(1)     | VZV (1)<br>M. fortuitum(1)                                                                      | Linezolid, isoniazid, rifampicin, ethambutol, clarithromycin, ofloxacin, azithromycin, amikacin,          | —                            | AIGA positive | —                                                                                     | None       | — | Lymph nodes (1)<br>Skin(1)                                                     | Remission  |
|    |                            |             | 47                                                            | F(1)                                                                               | Thailand(1)     | M. preregrinum(1)                                                                               | Linezolid, isoniazid, rifampicin, ethambutol, ofloxacin, azithromycin                                     | —                            | AIGA positive | —                                                                                     | None       | — | Lymph nodes (1)<br>Lung (1)                                                    | Relapse    |
|    |                            |             | 48                                                            | M(1)                                                                               | Thailand(1)     | VZV (1)<br>M. abscessus (1)                                                                     | Linezolid, isoniazid, rifampicin, ethambutol, ofloxacin, clarithromycin, azithromycin, amikacin, imipenem | —                            | AIGA positive | —                                                                                     | None       | — | Skin(1)<br>Lymph nodes (1)<br>Abdominal (1)<br>Liver (1)<br>Lacrimal gland (1) | Persistent |
|    |                            |             | 45                                                            | F(1)                                                                               | Thailand(1)     | VZV (1)<br>M. abscessus (1)                                                                     | Linezolid, clarithromycin, amikacin, imipenem, doxycycline, ofloxacin                                     | —                            | AIGA positive | —                                                                                     | None       | — | Lymph nodes (1)<br>Skin(1)<br>Bone (1)                                         | Relapse    |
|    |                            |             | 43                                                            | F(1)                                                                               | Thailand(1)     | Cryptococcosis (1)<br>VZV (1)<br>M. abscessus(1)                                                | Linezolid, ethambutol, clarithromycin, amikacin, ofloxacin, isoniazid,imipenem                            | —                            | AIGA positive | —                                                                                     | None       | — | Lymph nodes (1)<br>Liver(1)<br>Bone (1)                                        | Relapse    |
|    |                            |             | 42                                                            | F(1)                                                                               | Thailand(1)     | Salmonella spp(1)<br>M. tuberculosis (1)<br>VZV (1)<br>Cladophialophora (1)<br>Rapid grower NTM | Ofloxacin, azithromycin, imipenem, clarithromycin, moxifloxacin, linezolid                                | —                            | AIGA positive | —                                                                                     | None       | — | Lymph nodes (1)<br>Liver(1)<br>Spleen (1)<br>Lacrimal gland (1)                | Death      |
|    |                            |             | 47                                                            | F(1)                                                                               | Thailand(1)     | VZV (1)<br>M. simiae (1)<br>M. abscessus (1)<br>M. fortuitum (1)                                | Linezolid, clarithromycin, ofloxacin, ethambutol, isoniazid, rifampicin, ciprofloxacin                    | —                            | AIGA positive | —                                                                                     | None       | — | Lymph nodes (1)<br>Skin(1)<br>Sinus (1)<br>Tonsil (1)                          | Remission  |
|    |                            |             | 45                                                            | F(1)                                                                               | Thailand(1)     | VZV (1)<br>M. fortuitum (1)                                                                     | Linezolid, ethambutol, clarithromycin, ofloxacin                                                          | —                            | AIGA positive | —                                                                                     | None       | — | Lymph nodes (1)                                                                | Persistent |
|    |                            |             | 57                                                            | F(1)                                                                               | Thailand(1)     | Salmonella spp(1)<br>VZV (1)<br>M. abscessus (1)                                                | Linezolid, clarithromycin, amikacin, imipenem, doxycycline, ofloxacin                                     | —                            | AIGA positive | —                                                                                     | None       | — | Lymph nodes (1)<br>Liver(1)<br>Spleen (1)<br>Blood (1)                         | Persistent |
|    |                            |             | 48                                                            | F(1)                                                                               | Thailand(1)     | Cryptococcosis (1)<br>M. abscessus (1)                                                          | Linezolid, clarithromycin, ofloxacin, ethambutol, imipenem, cefoxitin, amikacin                           | —                            | AIGA positive | —                                                                                     | None       | — | Lymph nodes (1)<br>Bone (1)                                                    | Persistent |
|    |                            |             | 63                                                            | M(1)                                                                               | Thailand(1)     | Histoplasmosis (1)<br>VZV (1)<br>M. abscessus (1)                                               | Linezolid, clarithromycin, ofloxacin, imipenem                                                            | —                            | AIGA positive | —                                                                                     | None       | — | Lymph nodes (1)<br>Liver(1)<br>Bone (1)                                        | Remission  |
| 34 | M(1)                       | Thailand(1) | Cryptococcosis (1)<br>M. tuberculosis (1)<br>M. abscessus (1) | Linezolid, azithromycin, ofloxacin, imipenem                                       | —               | AIGA positive                                                                                   | —                                                                                                         | None                         | —             | Lymph nodes (1)                                                                       | Persistent |   |                                                                                |            |
| 34 | F(1)                       | Thailand(1) | VZV (1)<br>M. abscessus (1)                                   | Linezolid, isoniazid, clarithromycin, ofloxacin, ethambutol,azithromycin, imipenem | —               | AIGA positive                                                                                   | —                                                                                                         | None                         | —             | Lymph nodes (1)                                                                       | Remission  |   |                                                                                |            |
| 22 | DeLeon TT, 2014[22]        | 1           | 77                                                            | M(1)                                                                               | Philippines (1) | Salmonella spp(1)<br>M. Avium Complex(1)                                                        | Treatment with antimicrobial agents                                                                       | —                            | AIGA positive | —                                                                                     | None       | — | Lung (1)<br>Thoracic cavity (1)<br>Digestive system (1)                        | Remission  |
| 23 | Suzuki K, 2014[23]         | 1           | 74                                                            | F(1)                                                                               | Japan (1)       | M. fortuitum (1)                                                                                | Levofloxacin, imipenem/cilastatin, amikacin, clarithromycin                                               | 54 E.U.<br>(control 18 E.U.) | AIGA positive | Inhibited STAT-1 phosphorylation<br>(STAT1 phosphorylation index: 47,<br>control 407) | None       | — | Lymph nodes (1)<br>Lung (1)                                                    | Remission  |

|    |                        |      |             |                                                                             |             |                                                                                                                       |                                                                            |     |               |                                        |                                            |                                                                                                    |                                                                                                          |            |
|----|------------------------|------|-------------|-----------------------------------------------------------------------------|-------------|-----------------------------------------------------------------------------------------------------------------------|----------------------------------------------------------------------------|-----|---------------|----------------------------------------|--------------------------------------------|----------------------------------------------------------------------------------------------------|----------------------------------------------------------------------------------------------------------|------------|
| 24 | Czaja CA, 2014 [24]    | 1    | 78          | M(1)                                                                        | Japan (1)   | EBV (1)<br>M. chelonae-abscessus (1)<br>VZV(1)<br>Cytomegalovirus(1)                                                  | Azithromycin, imipenem/cilastatin, and tobramycin. Recurrences twice.      | --- | AIGA positive | ---                                    | Rituximab                                  | ---                                                                                                | Lymph nodes (1)<br>Lung (1)<br>Joint (1)<br>Bone (1)<br>Skin (1)                                         | Remission  |
| 25 | O'Connell E, 2014 [25] | 1    | 39          | F(1)                                                                        | America(1)  | M. aviumcomplex (1)                                                                                                   | Isoniazid, rifampin, ethambutol, pyrazinamide, azithromycin.<br>Persistent | --- | AIGA positive | Inhibited pSTAT-1 and IL-12 production | None                                       | ---                                                                                                | Throat (1)<br>Brain(1)<br>Lymph nodes (1)<br>Lung (1)                                                    | Persistent |
| 26 | Hase I, 2015 [26]      | 1    | 65          | M(1)                                                                        | Japan (1)   | M. gordonae (1)<br>M. mantonii (1)                                                                                    | Clarithromycin, rifampicin, ethambutol                                     | --- | AIGA positive | ---                                    | None                                       | Decreased gradually with the above-mentioned treatment, though it remained above the normal level. | Bone (1)<br>Lung (1)<br>Lymph nodes (1)<br>Skin (1)                                                      | Remission  |
| 27 | Otome O, 2015 [27]     | 1    | 71          |                                                                             | Cambodia(1) | M. haemophilum(1)                                                                                                     | Clarithromycin, ciprofloxacin, rifampicin                                  | --- | AIGA positive | ---                                    | None                                       | ---                                                                                                | Bone (1)<br>Lung (1)<br>Thoracic cavity (1)                                                              | Remission  |
| 28 | Pithukpakorn M,        | 32   | 43          | F(1)                                                                        | Thailand(1) | M. tuberculosis (1)<br>Salmonella spp(1)<br>M.abscessus (1)                                                           | ---                                                                        | --- | AIGA positive | ---                                    | None                                       | ---                                                                                                | Blood (1)<br>Lung (1)                                                                                    | Remission  |
|    |                        |      | 57          | F(1)                                                                        | Thailand(1) | Histoplasma capsulatum(1)<br>T. marneffeii (1)<br>Burkholderia pseudomallei(1)<br>M.abscessus(1)<br>Salmonella spp(1) | ---                                                                        | --- | AIGA positive | ---                                    | None                                       | ---                                                                                                | Lymph nodes (1)<br>Joint (1)                                                                             | Death      |
|    |                        |      | 53          | M(1)                                                                        | Thailand(1) | M.abscessus (1)<br>M.intracellulare (1)<br>VZV (1)                                                                    | ---                                                                        | --- | AIGA positive | ---                                    | None                                       | ---                                                                                                | Lymph nodes (1)<br>Blood (1)<br>Lung (1)                                                                 | Remission  |
|    |                        |      | 37          | F(1)                                                                        | Thailand(1) | M.abscessus (1)<br>Salmonella spp(1)                                                                                  | ---                                                                        | --- | AIGA positive | ---                                    | None                                       | ---                                                                                                | Lymph nodes (1)<br>Blood (1)                                                                             | Death      |
|    |                        |      | 57          | F(1)                                                                        | Thailand(1) | M.abscessus (1)                                                                                                       | ---                                                                        | --- | AIGA positive | ---                                    | None                                       | ---                                                                                                | Lymph nodes (1)                                                                                          | Remission  |
|    |                        |      | 48          | F(1)                                                                        | Thailand(1) | Salmonella spp(1)                                                                                                     | ---                                                                        | --- | AIGA positive | ---                                    | None                                       | ---                                                                                                | Blood (1)                                                                                                | Remission  |
|    |                        |      | 48          | F(1)                                                                        | Thailand(1) | M.abscessus(1)                                                                                                        | ---                                                                        | --- | AIGA positive | ---                                    | None                                       | ---                                                                                                | Bone marrow (1)                                                                                          | Remission  |
|    |                        |      | 69          | M(1)                                                                        | Thailand(1) | Salmonella spp(1)<br>M.hemophilum(1)                                                                                  | ---                                                                        | --- | AIGA positive | ---                                    | None                                       | ---                                                                                                | Bone marrow (1)<br>Blood (1)                                                                             | Remission  |
|    |                        |      | 57          | F(1)                                                                        | Thailand(1) | M.abscessus(1)                                                                                                        | ---                                                                        | --- | AIGA positive | ---                                    | None                                       | ---                                                                                                | Lymph nodes (1)<br>Blood (1)                                                                             | Remission  |
|    |                        |      | 60          | F(1)                                                                        | Thailand(1) | M.fortuitum (1)<br>VZV (1)<br>T. marneffeii (1)<br>M. abscessus (1)                                                   | ---                                                                        | --- | AIGA positive | ---                                    | None                                       | ---                                                                                                | Lymph nodes (1)<br>Blood (1)<br>Skin (1)                                                                 | Remission  |
|    |                        |      | 26          | M(1)                                                                        | Thailand(1) | M.abscessus<br>Cryptococcus neoformans<br>M.fortuitum<br>T. marneffeii (1)                                            | ---                                                                        | --- | AIGA positive | ---                                    | None                                       | ---                                                                                                | Lymph nodes (1)<br>Blood (1)<br>Skin (1)<br>Cerebrospinal fluid (1)<br>Joint (1)<br>Skin soft tissue (1) | Death      |
|    |                        |      | 51          | M(1)                                                                        | Thailand(1) | Salmonella spp (1)<br>M.abscessus (1)<br>VZV (1)                                                                      | ---                                                                        | --- | AIGA positive | ---                                    | None                                       | ---                                                                                                | Lymph nodes (1)<br>Blood (1)                                                                             | Remission  |
|    |                        |      | 68          | M(1)                                                                        | Thailand(1) | M.abscessus (1)<br>VZV (1)                                                                                            | ---                                                                        | --- | AIGA positive | ---                                    | None                                       | ---                                                                                                | Lymph nodes (1)                                                                                          | Remission  |
|    |                        |      | 57          | F(1)                                                                        | Thailand(1) | M.abscessus (1)<br>Salmonella spp (1)<br>Hemophilus influenzae(1)                                                     | ---                                                                        | --- | AIGA positive | ---                                    | None                                       | ---                                                                                                | Lymph nodes (1)<br>Blood (1)<br>Skin (1)<br>Lung (1)                                                     | Death      |
|    |                        |      | 24          | M(1)                                                                        | Thailand(1) | M.abscessus(1)                                                                                                        | ---                                                                        | --- | AIGA positive | ---                                    | None                                       | ---                                                                                                | Lymph nodes (1)<br>Blood (1)<br>Lung (1)                                                                 | Remission  |
|    |                        |      | 74          | M(1)                                                                        | Thailand(1) | M.scrofulaceum (1)<br>M.fortuitum(1)                                                                                  | ---                                                                        | --- | AIGA positive | ---                                    | None                                       | ---                                                                                                | Lymph nodes (1)<br>Skin (1)                                                                              | Remission  |
|    |                        |      | 46          | F(1)                                                                        | Thailand(1) | M.aviumcomplex (1)<br>VZV (1)                                                                                         | ---                                                                        | --- | AIGA positive | ---                                    | None                                       | ---                                                                                                | Lymph nodes (1)                                                                                          | Remission  |
|    | 59                     | M(1) | Thailand(1) | M.abscessus (1)<br>Salmonella spp (1)                                       | ---         | ---                                                                                                                   | AIGA positive                                                              | --- | None          | ---                                    | Lymph nodes (1)                            | Remission                                                                                          |                                                                                                          |            |
|    | 33                     | F(1) | Thailand(1) | VZV (1)<br>M.abscessus (1)                                                  | ---         | ---                                                                                                                   | AIGA positive                                                              | --- | None          | ---                                    | Lymph nodes (1)<br>Blood (1)               | Persistent                                                                                         |                                                                                                          |            |
|    | 47                     | M(1) | Thailand(1) | Burkholderia pseudomallei (1)<br>Salmonella spp (1)<br>Mycobacterium spp(1) | ---         | ---                                                                                                                   | AIGA positive                                                              | --- | None          | ---                                    | Lymph nodes (1)<br>Blood (1)<br>Muscle (1) | Remission                                                                                          |                                                                                                          |            |
|    | 41                     | F(1) | Thailand(1) | Salmonella spp (1)                                                          | ---         | ---                                                                                                                   | AIGA positive                                                              | --- | None          | ---                                    | Blood (1)<br>Muscle (1)                    | Persistent                                                                                         |                                                                                                          |            |

|    |                             |    |                 |                |             |                                                                                                                                                                                                                                                                                                                                                                                                                                                                                                                                                                                                                             |                                                                                                                                                                                                                                                                   |                                                                        |               |                   |                                 |                              |                                                                                                                                                                                                             |                                             |
|----|-----------------------------|----|-----------------|----------------|-------------|-----------------------------------------------------------------------------------------------------------------------------------------------------------------------------------------------------------------------------------------------------------------------------------------------------------------------------------------------------------------------------------------------------------------------------------------------------------------------------------------------------------------------------------------------------------------------------------------------------------------------------|-------------------------------------------------------------------------------------------------------------------------------------------------------------------------------------------------------------------------------------------------------------------|------------------------------------------------------------------------|---------------|-------------------|---------------------------------|------------------------------|-------------------------------------------------------------------------------------------------------------------------------------------------------------------------------------------------------------|---------------------------------------------|
|    |                             |    | 51              | M(1)           | Thailand(1) | VZV(1)<br>Salmonella spp (1)<br>M.aviumcomplex(1)                                                                                                                                                                                                                                                                                                                                                                                                                                                                                                                                                                           | ---                                                                                                                                                                                                                                                               | ---                                                                    | AIGA positive | ---               | None                            | ---                          | Blood (1)                                                                                                                                                                                                   | Persistent                                  |
|    |                             |    | 36              | F(1)           | Thailand(1) | Cryptococcus neoforman (1)<br>M.abscessus(1)                                                                                                                                                                                                                                                                                                                                                                                                                                                                                                                                                                                | ---                                                                                                                                                                                                                                                               | ---                                                                    | AIGA positive | ---               | None                            | ---                          | Lymph nodes (1)<br>Blood (1)<br>Lung (1)                                                                                                                                                                    | Remission                                   |
|    |                             |    | 42              | F(1)           | Thailand(1) | Salmonella spp (1)<br>M.fortuitum(1)<br>M.abscessus(1)                                                                                                                                                                                                                                                                                                                                                                                                                                                                                                                                                                      | ---                                                                                                                                                                                                                                                               | ---                                                                    | AIGA positive | ---               | None                            | ---                          | Blood (1)<br>Brain (1)                                                                                                                                                                                      | Remission                                   |
|    |                             |    | 40              | M(1)           | Thailand(1) | VZV (1)<br>Salmonella spp (1)<br>Burkholderia pseudomallei (1)<br>M.abscessus (1)                                                                                                                                                                                                                                                                                                                                                                                                                                                                                                                                           | ---                                                                                                                                                                                                                                                               | ---                                                                    | AIGA positive | ---               | None                            | ---                          | Blood (1)<br>Spleen (1)                                                                                                                                                                                     | Remission                                   |
|    |                             |    | 64              | M(1)           | Thailand(1) | Mycobacterium spp (1)                                                                                                                                                                                                                                                                                                                                                                                                                                                                                                                                                                                                       | ---                                                                                                                                                                                                                                                               | ---                                                                    | AIGA positive | ---               | None                            | ---                          | Lymph nodes (1)                                                                                                                                                                                             | Persistent                                  |
|    |                             |    | 58              | F(1)           | Thailand(1) | M.intracellulare (1)<br>M.abscessus (1)                                                                                                                                                                                                                                                                                                                                                                                                                                                                                                                                                                                     | ---                                                                                                                                                                                                                                                               | ---                                                                    | AIGA positive | ---               | None                            | ---                          | Lymph nodes (1)<br>Skin soft tissue (1)                                                                                                                                                                     | Persistent                                  |
|    |                             |    | 64              | M(1)           | Thailand(1) | Salmonella spp (1)<br>M.abscessus(1)                                                                                                                                                                                                                                                                                                                                                                                                                                                                                                                                                                                        | ---                                                                                                                                                                                                                                                               | ---                                                                    | AIGA positive | ---               | None                            | ---                          | Lymph nodes (1)<br>Blood (1)                                                                                                                                                                                | Remission                                   |
|    |                             |    | 43              | F(1)           | Thailand(1) | M.fortuitum (1)<br>Mycobacterium spp (1)                                                                                                                                                                                                                                                                                                                                                                                                                                                                                                                                                                                    | ---                                                                                                                                                                                                                                                               | ---                                                                    | AIGA positive | ---               | None                            | ---                          | Lymph nodes (1)<br>Blood (1)                                                                                                                                                                                | Remission                                   |
|    |                             |    | 50              | F(1)           | Thailand(1) | M.scrofulaceum (1)<br>Mycobacterium spp(1)                                                                                                                                                                                                                                                                                                                                                                                                                                                                                                                                                                                  | ---                                                                                                                                                                                                                                                               | ---                                                                    | AIGA positive | ---               | None                            | ---                          | Bone marrow (1)<br>Blood (1)<br>Skin soft tissue (1)                                                                                                                                                        | Remission                                   |
|    |                             |    | 63              | F(1)           | Thailand(1) | M.abscessus (1)                                                                                                                                                                                                                                                                                                                                                                                                                                                                                                                                                                                                             | ---                                                                                                                                                                                                                                                               | ---                                                                    | AIGA positive | ---               | None                            | ---                          | Lymph nodes (1)                                                                                                                                                                                             | Remission                                   |
|    |                             |    | 46              | F(1)           | Thailand(1) | Salmonella spp (1)<br>Cryptococcus neoformans (1)<br>M.abscessus (1)                                                                                                                                                                                                                                                                                                                                                                                                                                                                                                                                                        | ---                                                                                                                                                                                                                                                               | ---                                                                    | AIGA positive | ---               | None                            | ---                          | Joint (1)<br>Blood (1)                                                                                                                                                                                      | Remission                                   |
| 29 | Hanitsch LG, 2015[29]       | 1  | 65              | F(1)           | German (1)  | M. avium (1)<br>Salmonella spp (1)                                                                                                                                                                                                                                                                                                                                                                                                                                                                                                                                                                                          | Sulfadiazine/pyrimethamine, rifampicin, myambutol and clarithromycin. Deteriorate                                                                                                                                                                                 | ---                                                                    | AIGA positive | Inhibited pSTAT-1 | None                            | ---                          | Lung (1)<br>Pancreas (1)<br>Lymph nodes (1)                                                                                                                                                                 | Persistent                                  |
| 30 | Liu TT, 2016 [30]           | 1  | 59              | M(1)           | China (1)   | M. abscessus (1)                                                                                                                                                                                                                                                                                                                                                                                                                                                                                                                                                                                                            | Clarithromycin, Doxycyclin, Cefitibuten                                                                                                                                                                                                                           | ---                                                                    | AIGA positive | ---               | Rituximab                       | ---                          | Lung (1)<br>Skin (1)<br>Lymph nodes (1)                                                                                                                                                                     | Remission                                   |
| 31 | Nishimura T, 2015 [31]      | 1  | 65              | F(1)           | Japan (1)   | M. avium Complex (1)                                                                                                                                                                                                                                                                                                                                                                                                                                                                                                                                                                                                        | Rifampin, ethambutol, clarithromycin, kanamycin, levofloxacin, gatifloxacin                                                                                                                                                                                       | ---                                                                    | AIGA positive | ---               | None                            | ---                          | Lung (1)<br>Skin (1)<br>Liver (1)<br>Spleen (1)                                                                                                                                                             | Relapse                                     |
| 32 | Chi CY, 2016 [32]           | 45 | Mean 59 (38-87) | M(21)<br>F(24) | China (45)  | M. abscessus (14)<br>M. fortuitum (1)<br>M. chelonae (1)<br>M. avium complex (13)<br>M. kansasii (3)<br>M. scrofulaceum (2)<br>M. gordonae (2)<br>M. terrae complex (1)<br>Mycobacterium szulgai (1)<br>NTM Species not specified (14)<br>Non-typhoid Salmonella species (18)<br>Legionella pneumophila (1)<br>Staphylococcus aureus(1)<br>Penicillium marneffeii(4)<br>Aspergillus species(1)<br>Cryptococcus neoformans (1)<br>Epstein-Barr virus(1)<br>Hepatitis C virus (5)<br>Herpes simplex virus 1(13)<br>Herpes simplex virus 2 (5)<br>Cytomegalovirus(16)<br>Varicella-zoster virus(14)<br>Epstein-Barr virus (18) | Ethambutol, rifampin, rifabutin, tetracyclines, linezolid, cefitibuten                                                                                                                                                                                            | Most cases (95.6%) had an initial nAIGA titer $\geq 10^{-4}$ dilution. | AIGA positive | ---               | None                            | ---                          | Lymph node (36)<br>Bone (27)<br>Joint (9)<br>Lung (28)<br>Skin (12)<br>Muscle (2)<br>Spleen (4)<br>Liver (4)<br>Peritoneum (4)<br>Genitourinary system (2)<br>Central nervous system (1)<br>Pericardium (1) | Remission(9)<br>Persistent (27)<br>Lost (9) |
| 33 | Lee TL, 2016 [33]           | 1  | 55              | F(1)           | Malaysia    | M. abscessus (1)<br>M. tuberculosis (1)                                                                                                                                                                                                                                                                                                                                                                                                                                                                                                                                                                                     | Trimethoprim/sulphamethoxazole, levofloxacin, amikacin, cefoxitin, clarithromycin, rifampicin, isoniazid, Isoniazid, rifampicin, pyrazinamide, ethambutol, amikacin, imipenem/cilastatin, clarithromycin, ciprofloxacin; liposomal amphotericin-B + itraconazole; | ---                                                                    | AIGA positive | Inhibited pSTAT-1 | None                            | ---                          | Eye (1)<br>Lymph node (1)                                                                                                                                                                                   | Persistent                                  |
| 34 | Pruetpongpun N, 2016 [2016] | 1  | 72              | M(1)           | Thailand(1) | T. marneffeii (1)<br>M. abscessus(1)                                                                                                                                                                                                                                                                                                                                                                                                                                                                                                                                                                                        | Isoniazid, rifampicin, pyrazinamide, ethambutol, amikacin, imipenem/cilastatin, clarithromycin, ciprofloxacin; liposomal amphotericin-B + itraconazole;                                                                                                           | 1:10 000                                                               | AIGA positive | ---               | Methylprednisolone<br>Rituximab | 1:10 000 decreased to 1:5000 | Lung (1)<br>Skin (1)<br>Lymph nodes (1)                                                                                                                                                                     | Remission                                   |
| 35 | Valour F, 2016 [35]         | 1  | 50              | F(1)           | Laos(1)     | M. fortuitum (1)<br>M. intracellulare (1)<br>VZV (1)                                                                                                                                                                                                                                                                                                                                                                                                                                                                                                                                                                        | Azithromycin, ciprofloxacin, rifabutin, ethambutol, amikacin, moxifloxacin                                                                                                                                                                                        | ---                                                                    | AIGA positive | ---               | None                            | ---                          | Lymph nodes (1)                                                                                                                                                                                             | Relapse                                     |

|    |                           |      |             |                               |               |                                                                                                                                                                                                                                                                                           |                                                                                     |                                                                          |               |                   |                                                   |                        |                                                                                                                                                                                                        |            |
|----|---------------------------|------|-------------|-------------------------------|---------------|-------------------------------------------------------------------------------------------------------------------------------------------------------------------------------------------------------------------------------------------------------------------------------------------|-------------------------------------------------------------------------------------|--------------------------------------------------------------------------|---------------|-------------------|---------------------------------------------------|------------------------|--------------------------------------------------------------------------------------------------------------------------------------------------------------------------------------------------------|------------|
| 36 | Kobayashi T, 2016 [36]    | 3    | 67          | F(1)                          | Japan (1)     | M. avium (1)                                                                                                                                                                                                                                                                              | Ethambutol, rifabutin, clarithromycin, ciprofloxacin                                | —                                                                        | AIGA positive | —                 | None                                              | —                      | Blood (1)<br>Lymph nodes (1)<br>Lung<br>Bone(1)                                                                                                                                                        | Death      |
|    |                           |      | 66          | M(1)                          | Japan (1)     | M. avium (1)                                                                                                                                                                                                                                                                              | Clarithromycin, rifampin, ethambutol                                                | —                                                                        | AIGA positive | —                 | None                                              | —                      | Lymph nodes<br>Bone(1)                                                                                                                                                                                 | Remission  |
|    |                           |      | 71          | M(1)                          | Japan (1)     | M. kansasii (1)                                                                                                                                                                                                                                                                           | Isoniazid, rifampin, ethambutol, pyrazinamide                                       | —                                                                        | AIGA positive | —                 | None                                              | —                      | Muscle (1)<br>Bone(1)                                                                                                                                                                                  | Remission  |
| 37 | Ikeda H, 2016 [37]        | 1    | 68          | M(1)                          | Japan (1)     | M. avium (1)                                                                                                                                                                                                                                                                              | Clarithromycin, rifampicin, ethambutol                                              | OD: 0.409, (0.037 in a negative control well)<br>728.13 ELISA Units (EU) | AIGA positive | —                 | None                                              | Decreased to 109.29 EU | Lung (1)<br>Skin (1)<br>Lymph nodes (1)                                                                                                                                                                | Remission  |
| 38 | van de Vosse E, 2017 [38] | 1    | 38          | F(1)                          | Surinam (1)   | Histoplasma capsulatum (1)                                                                                                                                                                                                                                                                | Itraconazole                                                                        | —                                                                        | AIGA positive | —                 | None                                              | —                      | Lymph nodes (1)<br>Throat (1)<br>Eye (1)<br>Spleen (1)<br>Liver (1)<br>Skin (1)<br>Soft tissue (1)                                                                                                     | Relapse    |
| 39 | Chang PH, 2017 [39]       | 1    | 73          | M(1)                          | China         | M. abscessus (1)                                                                                                                                                                                                                                                                          | Azithromycin, imipenem, doxycycline, levofloxacin.                                  | —                                                                        | AIGA positive | —                 | None                                              | —                      | Parotid gland (1)<br>Lymph nodes (1)                                                                                                                                                                   | Remission  |
| 40 | Chetchotisakd P, 2017[40] | 10   | 34          | M(1)                          | Thailand(1)   | cryptococcosis (1)<br>NTM (1)                                                                                                                                                                                                                                                             | —                                                                                   | 1:1,600,000                                                              | AIGA positive | —                 | None                                              | —                      | Lung (1)                                                                                                                                                                                               | Unknown    |
|    |                           |      | 49          | F(1)                          | Thailand(1)   | cryptococcosis (1)<br>NTM (1)                                                                                                                                                                                                                                                             | —                                                                                   | 1:1,600,000                                                              | AIGA positive | —                 | None                                              | —                      | Blood (1)<br>Meninges (1)<br>Skin (1)                                                                                                                                                                  | Unknown    |
|    |                           |      | 45          | F(1)                          | Thailand(1)   | cryptococcosis (1)<br>NTM (1)                                                                                                                                                                                                                                                             | —                                                                                   | 1:200,000                                                                | AIGA positive | —                 | None                                              | —                      | Joint (1)<br>Bone (1)                                                                                                                                                                                  | Unknown    |
|    |                           |      | 47          | F(1)                          | Thailand(1)   | cryptococcosis (1)<br>NTM (1)                                                                                                                                                                                                                                                             | —                                                                                   | 1:50,000                                                                 | AIGA positive | —                 | None                                              | —                      | Blood (1)                                                                                                                                                                                              | Unknown    |
|    |                           |      | 32          | M(1)                          | Thailand(1)   | cryptococcosis (1)<br>NTM (1)                                                                                                                                                                                                                                                             | —                                                                                   | 1:5,000                                                                  | AIGA positive | —                 | None                                              | —                      | Bone (1)                                                                                                                                                                                               | Unknown    |
|    |                           |      | 18          | F(1)                          | Thailand(1)   | cryptococcosis (1)<br>NTM (1)                                                                                                                                                                                                                                                             | —                                                                                   | 1:200,000                                                                | AIGA positive | —                 | None                                              | —                      | Pleura (1)                                                                                                                                                                                             | Unknown    |
|    |                           |      | 55          | F(1)                          | Thailand(1)   | cryptococcosis (1)<br>NTM (1)                                                                                                                                                                                                                                                             | —                                                                                   | 1:10,000                                                                 | AIGA positive | —                 | None                                              | —                      | Lung (1)                                                                                                                                                                                               | Unknown    |
|    |                           |      | 82          | F(1)                          | Thailand(1)   | cryptococcosis (1)<br>NTM (1)                                                                                                                                                                                                                                                             | —                                                                                   | 1:10,000                                                                 | AIGA positive | —                 | None                                              | —                      | Parotid gland (1)                                                                                                                                                                                      | Unknown    |
|    |                           |      | 34          | M(1)                          | Thailand(1)   | cryptococcosis (1)<br>NTM (1)                                                                                                                                                                                                                                                             | —                                                                                   | 1:10,000                                                                 | AIGA positive | —                 | None                                              | —                      | Bone (1)<br>Joint (1)<br>Lung(1)<br>Skin (1)                                                                                                                                                           | Unknown    |
|    | 43                        | F(1) | Thailand(1) | cryptococcosis (1)<br>NTM (1) | —             | 1:10,000                                                                                                                                                                                                                                                                                  | AIGA positive                                                                       | —                                                                        | None          | —                 | Joint (1)<br>Bone (1)<br>Meninges (1)<br>Skin (1) | Unknown                |                                                                                                                                                                                                        |            |
| 41 | King YA, 2017 [41]        | 1    | 74          | F(1)                          | China (1)     | M. kansasii (1)                                                                                                                                                                                                                                                                           | Clarithromycin, rifampin, ethambutol                                                | —                                                                        | AIGA positive | —                 | None                                              | —                      | Bone (1)<br>Skin (1)<br>Lymph nodes (1)                                                                                                                                                                | Remission  |
| 42 | Asakura T, 2017 [42]      | 1    | 66          | M(1)                          | Japan (1)     | M. genavense (1)                                                                                                                                                                                                                                                                          | Clarithromycin, ethambutol, rifampin, amikacin                                      | —                                                                        | AIGA positive | Inhibited pSTAT-1 | None                                              | —                      | Lymph nodes (1)<br>Lung (1)                                                                                                                                                                            | Remission  |
| 43 | Tanimizu M, 2017 [43]     | 1    | 72          | F(1)                          | Japan (1)     | M. avium (1)                                                                                                                                                                                                                                                                              | Rifabutin, ethambutol, clarithromycin, streptomycin                                 | 51,442 AU                                                                | AIGA positive | Inhibited pSTAT-1 | None                                              | —                      | Bone (1)<br>Lung (1)<br>Stomach (1)<br>Peritoneum (1)<br>Lymph nodes (1)                                                                                                                               | Remission  |
| 44 | Phoompong P, 2017 [44]    | 70   | mean 50     | M(30)<br>F(40)                | Thailand (70) | M.abscessus (51)<br>M. avium complex (8)<br>M.fortuitum (7)<br>M.kansasii (1)<br>M.simiae (1)<br>M.haemophilum (1)<br>M.scrofulaceum (1)<br>Non-typhoid Salmonella species (3)<br>tuberculosis (5)<br>nontyphoidal salmonellosis (17)<br>VZV(4)<br>Meliodosis (2)<br>Fungal infection (4) | —                                                                                   | OD value: 3.64<br>(range 1.32–4.61)                                      | AIGA positive | —                 | None                                              | —                      | Blood or bone marrow (23)<br>Sputum (9)<br>Skin or pus (6)<br>Pleural cavity (1)<br>Joint (1)<br>Lung(1)<br>Bowel (1)<br>Cardiac valve (1)<br>Bone (3)<br>Stool (2)<br>Vascular graft (1)<br>Liver (1) | Unknown    |
| 45 | Wu UI, 2017 [45]          | 1    | 43          | M(1)                          | China (1)     | M. avium complex (1)<br>Salmonella spp (1)<br>HIV (1)                                                                                                                                                                                                                                     | Tenofovir, lamivudine, and nevirapine for HIV.<br>Ciprofloxacin for Salmonella spp. | 959 mg/ml<br>(reference: 15.78 mg/ml).                                   | AIGA positive | Inhibited pSTAT-1 | None                                              | —                      | Joint (1)<br>Blood (1)<br>Bone (1)                                                                                                                                                                     | Persistent |

|    |                            |    |         |                |                 |                                                                                                                                                                                                                                           |                                                                                                                                 |                               |               |                                                       |                                                        |                        |                                                                                                                                                                                              |                            |
|----|----------------------------|----|---------|----------------|-----------------|-------------------------------------------------------------------------------------------------------------------------------------------------------------------------------------------------------------------------------------------|---------------------------------------------------------------------------------------------------------------------------------|-------------------------------|---------------|-------------------------------------------------------|--------------------------------------------------------|------------------------|----------------------------------------------------------------------------------------------------------------------------------------------------------------------------------------------|----------------------------|
| 46 | Suárez I, 2017 [46]        | 1  | 54      | F(1)           | Philippines (1) | M.parascrofulaceum (1)                                                                                                                                                                                                                    | Amikacin, rifampin, clarithromycin, moxifloxacin, linezolid                                                                     | —                             | AIGA positive | Inhibited pSTAT-1                                     | None                                                   | —                      | Soft tissue (1)<br>Bone (1)<br>Skin (1)<br>Lung (1)<br>Breast (1)                                                                                                                            | Relapse                    |
| 47 | Koizumi Y, 2017 [47]       | 1  | 67      | F(1)           | Japan (1)       | M. avium complex (1)                                                                                                                                                                                                                      | Clarithromycin, rifampicin, ethambutol, streptomycin, sitafloxacin, amikacin, linezolid, azithromycin, levofloxacin. Persistent | 137.3 E.U.                    | AIGA positive | Inhibited pSTAT-1                                     | Rituximab                                              | Decreased to 51.7 E.U. | Lymph nodes (1)<br>Lung (1)<br>Blood(1)<br>Bone (1)<br>Bone marrow (1)                                                                                                                       | Remission                  |
| 48 | Furuya H, 2017 [48]        | 1  | 55      | M(1)           | Japan (1)       | M. intracellulare (1)                                                                                                                                                                                                                     | Clarithromycin, ethambutol and rifampicin                                                                                       | —                             | AIGA positive | Inhibited pSTAT-1                                     | Prednisolone<br>Adalimumab                             | —                      | Lymph nodes (1)<br>Lung (1)<br>Blood(1)                                                                                                                                                      | Relapse                    |
| 49 | Xu H, 2018 [49]            | 1  | 54      | M(1)           | China (1)       | T. marneffeii (1)<br>M. abscessus (1)                                                                                                                                                                                                     | Fluconazole, amphotericin B, itraconazole;<br>Levofloxacin, clarithromycin                                                      | —                             | AIGA positive | —                                                     | None                                                   | —                      | Lymph nodes (1)<br>Lung (1)<br>Skin(1)                                                                                                                                                       | Remission                  |
| 50 | Hung TC, 2018 [50]         | 1  | 31      | F(1)           | China (1)       | M. kansasii (1)<br>M. abscessus (1)                                                                                                                                                                                                       | Isoniazid, rifampin, clarithromycin, ethambutol, amikacin, imipenem/cilastatin, levofloxacin                                    | —                             | AIGA positive | —                                                     | None                                                   | —                      | Lymph nodes (1)<br>Lung (1)<br>Bone(1)<br>Blood (1)                                                                                                                                          | Death                      |
| 51 | Koizumi Y,2019 [51]        | 1  | 66      | M(1)           | Japan (1)       | M. avium (1)<br>M. avium complex (1)                                                                                                                                                                                                      | Clarithromycin, rifampicin, ethambutol, rifabutin, sitafloxacin, streptomycin                                                   | 1017 ELISA Units (EU)         | AIGA positive | Inhibited pSTAT-1                                     | Rituximab<br>Prednisolone                              | Decrease to 36 E.U.    | Lymph nodes (1)<br>Lung (1)<br>Abdominal (1)                                                                                                                                                 | Death                      |
| 52 | Aoki A, 2018 [52]          | 31 | mean 66 | F(16)<br>M(15) | Japan (31)      | M. avium complex (26)<br>M. gordonae (2)<br>M. kansasii (1)<br>M. mantenii (1)<br>M. colombiense (1)<br>M. genavense (1)<br>M. abscessus complex (3)<br>M. fortuitum (2)<br>Salmonella (1)<br>Cytomegalovirus (1)<br>Varicella zoster (1) | —                                                                                                                               | —                             | AIGA positive | Inhibited pSTAT-1                                     | Rituximab<br>Recombinant IFN-γ                         | —                      | Lung (19)<br>Bone/joints (19)<br>Lymph nodes (15)<br>Bone marrow/blood (15)<br>Skin (8)<br>Spleen/liver (6)<br>Muscle (4)<br>Urinary organ (2)<br>Genitals (1)<br>Central nervous system (1) | Remission(27)<br>Death (4) |
| 53 | Miyashita K, 2018 [53]     | 1  | 63      | F(1)           | Japan (1)       | M. avium (1)                                                                                                                                                                                                                              | Clarithromycin, rifampicin, ethambutol, streptomycin                                                                            | 427 E.U.<br>(control: 22 E.U) | AIGA positive | Inhibited pSTAT-1<br>pSTAT1 index: 113, control: 1042 | None                                                   | —                      | Lung (1)<br>Bone (1)<br>Lymph nodes (1)<br>Skin (1)<br>Spleen (1)<br>Muscle (1)<br>Urinary organ (1)                                                                                         | Remission                  |
| 54 | Yamada T, 2018 [54]        | 1  | 76      | M(1)           | Japan (1)       | M. intracellulare (1)                                                                                                                                                                                                                     | Clarithromycin, ethambutol, rifampicin, streptomycin                                                                            | —                             | AIGA positive | —                                                     | None                                                   | —                      | Lymph nodes (1)                                                                                                                                                                              | Remission                  |
| 55 | Chetchotisakd P, 2018 [55] | 8  | 52      | M(1)           | Thailand (1)    | M. abscessus (1)<br>Tuberculosis (1)<br>Herpes zoster (1)<br>T. marneffeii (1)                                                                                                                                                            | Clarithromycin, ofloxacin, ceftazidime, imipenem; Persistent                                                                    | 1:100,000                     | AIGA positive | —                                                     | Cyclophosphamide<br>Methylprednisolone<br>Prednisolone | 1 : 50,000             | Lymph nodes(1)<br>Lung (1)<br>Spleen (1)                                                                                                                                                     | Death                      |
|    |                            |    | 54      | M(1)           | Thailand (1)    | M. abscessus(1)                                                                                                                                                                                                                           | Clarithromycin, ciprofloxacin, imipenem; Persistent                                                                             | 1:200,000                     | AIGA positive | —                                                     | Cyclophosphamide<br>Methylprednisolone<br>Prednisolone | 1 : 5,000              | Lymph nodes (1)<br>Lung (1)                                                                                                                                                                  | Remission                  |
|    |                            |    | 57      | M(1)           | Thailand (1)    | M. abscessus(1)<br>M. tuberculosis (1)                                                                                                                                                                                                    | Azithromycin, ciprofloxacin, imipenem; Persistent                                                                               | 1:200,000                     | AIGA positive | —                                                     | Cyclophosphamide<br>Methylprednisolone<br>Prednisolone | 1 : 1,000              | Lymph nodes (1)<br>Lung (1)<br>Liver (1)                                                                                                                                                     | Remission                  |
|    |                            |    | 41      | M(1)           | Thailand (1)    | M. abscessus (1)<br>Melioidosis (1)                                                                                                                                                                                                       | Clarithromycin, ofloxacin, imipenem; Persistent                                                                                 | 1:200,000                     | AIGA positive | —                                                     | Cyclophosphamide<br>Methylprednisolone<br>Prednisolone | 1 : 1,000              | Lymph nodes (1)<br>Nasal septum (1)                                                                                                                                                          | Remission                  |
|    |                            |    | 54      | F(1)           | Thailand (1)    | M. abscessus (1)                                                                                                                                                                                                                          | Clarithromycin, ciprofloxacin, imipenem; Persistent                                                                             | 1:100,000                     | AIGA positive | —                                                     | Cyclophosphamide<br>Methylprednisolone<br>Prednisolone | 1 : 1,000              | Lymph nodes (1)<br>Skin (1)                                                                                                                                                                  | Remission                  |
|    |                            |    | 65      | M(1)           | Thailand (1)    | M. abscessus (1)<br>Salmonella spp (1)                                                                                                                                                                                                    | Imipenem, clarithromycin, ciprofloxacin; Persistent                                                                             | 1:100,000                     | AIGA positive | —                                                     | Cyclophosphamide<br>Methylprednisolone<br>Prednisolone | 1 : 5,000              | Lymph nodes (1)<br>Lung (1)<br>Bone (1)                                                                                                                                                      | Remission                  |
|    |                            |    | 34      | M(1)           | Thailand (1)    | M. abscessus(1)<br>Cryptococcosis (1)<br>M. tuberculosis (1)                                                                                                                                                                              | Clarithromycin, ciprofloxacin, linezolid, imipenem; Persistent                                                                  | 1:200,000                     | AIGA positive | —                                                     | Cyclophosphamide<br>Methylprednisolone<br>Prednisolone | 1 : 50,000             | Lymph nodes (1)<br>Lung (1)<br>Bone (1)                                                                                                                                                      | Relapse                    |
|    |                            |    | 20      | F(1)           | Thailand (1)    | M. abscessus(1)<br>Cryptococcosis (1)<br>VZV(1)                                                                                                                                                                                           | Azithromycin, ofloxacin, doxycycline, linezolid, imipenem; Persistent                                                           | 1:400,000                     | AIGA positive | —                                                     | Cyclophosphamide<br>Methylprednisolone<br>Prednisolone | 1 : 50,000             | Lymph nodes (1)<br>Skin (1)<br>Lung (1)<br>Liver (1)<br>Spleen (1)<br>Pancreas (1)<br>Bone (1)                                                                                               | Remission                  |



|    |                            |    |             |                |               |                                                                                                                                                                                                                                                                        |                                                                                                                                          |                                                                                      |               |                                           |      |   |                                                                                                                                |                                                                             |
|----|----------------------------|----|-------------|----------------|---------------|------------------------------------------------------------------------------------------------------------------------------------------------------------------------------------------------------------------------------------------------------------------------|------------------------------------------------------------------------------------------------------------------------------------------|--------------------------------------------------------------------------------------|---------------|-------------------------------------------|------|---|--------------------------------------------------------------------------------------------------------------------------------|-----------------------------------------------------------------------------|
| 56 | Wu UI, 2018 [56]           | 30 | mean 60     | F(11)<br>M(19) | China (30)    | M. tuberculosis (2)<br>M. avium complex (14)<br>M. kansasii (8)<br>M. abscessus (12)<br>M. chelonae (2)<br>M. goodii (2)<br>Mix NTM (8)<br>Non-typhoidal salmonellosis (9)<br>Cryptococcosis (1)<br>T. marneffei (1)<br>Aspergillosis (1)<br>VZV (12)                  | —                                                                                                                                        | —                                                                                    | AIGA positive | Inhibited the production of IFN- $\gamma$ | None | — | Lymph nodes (21)<br>Bone (17)<br>Skin and soft tissue (12)<br>Lung (16)<br>Blood/bone marrow (5)<br>Central nervous system (2) | Unknown                                                                     |
| 57 | Kashihara E, 2019 [57]     | 1  | 33          | M(1)           | Japan (1)     | M. kansasii (1)                                                                                                                                                                                                                                                        | Isoniazid, ethambutol, rifampin, pyrazinamide                                                                                            | 423.6                                                                                | AIGA positive | —                                         | None | — | Lymph nodes (1)<br>Lung (1)                                                                                                    | Remission                                                                   |
| 58 | Liew WK, 2019 [58]         | 2  | 16          | F(1)           | China (1)     | M. abscessus (1)                                                                                                                                                                                                                                                       | Clindamycin, ceftazidime, amikacin, linezolid, azithromycin                                                                              | —                                                                                    | AIGA positive | Inhibited pSTAT-1                         | None | — | Lymph nodes (1)<br>Skin (1)                                                                                                    | Remission                                                                   |
|    |                            |    | 10          | M(1)           | Malaysia (1)  | M. avium complex (1)                                                                                                                                                                                                                                                   | Clarithromycin, rifampicin, ethambutol.                                                                                                  | —                                                                                    | AIGA positive | —                                         | None | — | Lymph nodes (1)<br>Skin (1)<br>Bone (1)                                                                                        | Remission                                                                   |
| 59 | Wongkamhla T, 2019         | 1  | 52          | F(1)           | Thailand (1)  | T. marneffei (1)<br>M. abscessus (1)                                                                                                                                                                                                                                   | Amphotericin B, itraconazole; Imipenem, amikacin, clarithromycin, ciprofloxacin, linezolid                                               | —                                                                                    | AIGA positive | —                                         | None | — | Tonsils (1)<br>Oropharynx and larynx (1)                                                                                       | Relapse                                                                     |
| 60 | Ogawa Y, 2019 [60]         | 1  | 80          | M(1)           | Japan (1)     | M. avium complex (1)                                                                                                                                                                                                                                                   | —                                                                                                                                        | —                                                                                    | AIGA positive | —                                         | None | — | Lymph nodes (1)<br>Skin (1)<br>Bone (1)                                                                                        | Relapse                                                                     |
| 61 | Qiu Y, 2019 [61]           | 1  | 24          | M(1)           | China (1)     | Bacillus cereus (1)                                                                                                                                                                                                                                                    | Piperacillin, sulbactam, levofloxacin                                                                                                    | —                                                                                    | AIGA positive | —                                         | None | — | Bone (1)                                                                                                                       | Remission                                                                   |
| 62 | Xu X, 2019 [62]            | 1  | 43          | F(1)           | China (1)     | M. avium (1)                                                                                                                                                                                                                                                           | Clarithromycin, ethambutol, prothionamide, amoxicillin clavulanate potassium, amikacin, linezolid, imipenem, moxifloxacin                | —                                                                                    | AIGA positive | —                                         | None | — | Skin (1)<br>Bone (1)                                                                                                           | Persistent                                                                  |
| 63 | Angkasekwinai N, 2019 [63] | 80 | median 49.5 | F(41)<br>M(39) | Thailand (80) | M. abscessus (33)<br>M. fortuitum (7)<br>M. avium complex (3)<br>M. scrofulaceum (2)<br>Other NTM spp. (3)<br>Salmonella spp. (18)<br>M. tuberculosis (12)<br>Cryptococcosis (3)<br>T. marneffei (2)<br>Histoplasmosis (1)<br>VZV (6)<br>Burkholderia pseudomallei (1) | Amikacin and/or imipenem and/or ceftazidime followed by azithromycin or clarithromycin and levofloxacin or moxifloxacin or ciprofloxacin | 3.14 (1.57–4.38)<br>3.86 (1.38–4.61)                                                 | AIGA positive | —                                         | None | — | Lymph nodes (38)<br>Blood (19)                                                                                                 | Remission (11)<br>Persistent (20)<br>Relapse (28)<br>Death (4)<br>Lost (17) |
| 64 | Yeh YK, 2019 [64]          | 1  | 64          | M(1)           | China (1)     | M. avium complex (1)                                                                                                                                                                                                                                                   | Clarithromycin, rifabutin, ethambutol, amikacin                                                                                          | OD: 0.85<br>(control 0.07)                                                           | AIGA positive | —                                         | None | — | Skin (1)<br>Bone (1)<br>Lung (1)                                                                                               | Remission                                                                   |
| 65 | Yerramilli A, 2019 [65]    | 1  | 28          | M(1)           | India (1)     | M. abscessus complex (1)<br>M. abscessus (1)                                                                                                                                                                                                                           | Isoniazid, rifampicin, pyrazinamide, ethambutol, ceftazidime, tigecycline, amikacin                                                      | —                                                                                    | AIGA positive | Inhibited pSTAT-1                         | None | — | Lymph nodes (1)<br>Lung (1)                                                                                                    | Relapse                                                                     |
| 66 | Su SS, 2019 [66]           | 1  | 62          | F(1)           | China (1)     | T. marneffei (1)<br>M. avium intracellulare (1)<br>M. avium (1)                                                                                                                                                                                                        | Amphotericin B, itraconazole; Azithromycin, ethambutol, moxifloxacin, rifabutin                                                          | The patient (range: 33.13–47.06 ng/mL)<br>healthy subjects (range: 8.41–20.02 ng/mL) | AIGA positive | —                                         | None | — | Lymph nodes (1)<br>Lung (1)<br>Skin (1)<br>Joint (1)<br>Soft tissue (1)                                                        | Persistent                                                                  |
| 67 | Namkoong H, 2018 [67]      | 1  | 74          | M(1)           | Japan (1)     | M. avium (1)                                                                                                                                                                                                                                                           | Rifampicin, ethambutol, clarithromycin                                                                                                   | patient, 50.85 EU;<br>control, 25.49 EU                                              | AIGA positive | Inhibited pSTAT-1                         | None | — | Lymph nodes (1)<br>Lung (1)<br>Liver (1)<br>Cholecyst (1)                                                                      | Relapse                                                                     |
| 68 | Tanaka S, 2019 [68]        | 1  | 79          | F(1)           | Japan (1)     | M. phlei (1)                                                                                                                                                                                                                                                           | Rifampicin, ethambutol, clarithromycin, levofloxacin                                                                                     | —                                                                                    | AIGA positive | —                                         | None | — | Lymph nodes (1)<br>Lung (1)<br>Bone (1)                                                                                        | Remission                                                                   |
| 69 | Rujirachun P, 2020 [69]    | 1  | 53          | M(1)           | Thailand (1)  | Cryptococcus (1)<br>VZV(1)<br>M. abscessus (1)                                                                                                                                                                                                                         | Amphotericin B, fluconazole for cryptococcosis;<br>Amikacin, imipenem, azithromycin, levofloxacin for NTM; acyclovir for VZV.            | —                                                                                    | AIGA positive | —                                         | None | — | Lymph nodes (1)<br>Lung (1)<br>Thoracic cavity (1)<br>Cerebrospinal fluid (1)<br>Skin (1)<br>Eye (1)                           | Remission                                                                   |
| 70 | Yagham I, 2020 [70]        | 1  | 30          | F(1)           | America(1)    | M. avium complex (1)                                                                                                                                                                                                                                                   | —                                                                                                                                        | —                                                                                    | AIGA positive | —                                         | None | — | Lymph nodes (1)<br>Lung (1)<br>Esophagus(1)                                                                                    | Persistent                                                                  |

|    |                          |    |                                         |                |                                                                                                                       |                                                                                                                                                                                                                                                                                                                                                                                                                                                |                                                                                                                                           |                                          |               |                                                            |                                                  |           |                                                                                                                                                                                                                                      |                                                                            |
|----|--------------------------|----|-----------------------------------------|----------------|-----------------------------------------------------------------------------------------------------------------------|------------------------------------------------------------------------------------------------------------------------------------------------------------------------------------------------------------------------------------------------------------------------------------------------------------------------------------------------------------------------------------------------------------------------------------------------|-------------------------------------------------------------------------------------------------------------------------------------------|------------------------------------------|---------------|------------------------------------------------------------|--------------------------------------------------|-----------|--------------------------------------------------------------------------------------------------------------------------------------------------------------------------------------------------------------------------------------|----------------------------------------------------------------------------|
| 71 | Hong GH, 2020[71]        | 97 | Thailand (mean 50)<br>America (mean 46) | F(68)<br>M(29) | Thailand (n77)<br>Cambodia (1)<br>America(1) Philippines (7)<br>Laos (3)<br>Singapore (1)<br>China (3)<br>Vietnam (3) | M. abscessus (26)<br>M. avium complex (24)<br>M. asiaticum (1)<br>M. chelonae (3)<br>M. fortuitum (4)<br>M. goodii (13)<br>M. malmoense (1)<br>M. massiliense (1)<br>M. scrofulaceum (4)<br>NTM (11)<br>M. tuberculosis (12)<br>Salmonellosis (15)<br>VZV (17)<br>B. cepacia (1)<br>B. pseudomallei (5)<br>A. ustus (1)<br>Coccidioides spp (1)<br>C. neoformans (6)<br>H. capsulatum (10)<br>P. lilacinum (1)<br>T. marneffeii (5)<br>HSV (2) | —                                                                                                                                         | —                                        | AIGA positive | —                                                          | Cyclophosphamide: 8 cases<br>Rituximab: 10 cases | Decreased | Bone (30)<br>Lymph node (59)<br>Lung (31)<br>Skin (34)<br>Blood (22)<br>Liver/biliary tree (17)<br>Spleen (10)<br>Joints (9)<br>Sinus (8)<br>Central nervous system (6)<br>Muscle (3)<br>Genitourinary system (2)<br>Bone marrow (4) | Death (22)<br>Persistent (7)<br>Relapse (2)<br>Remission (61)<br>Lost (15) |
| 72 | Nagamura N, 2021 [72]    | 1  | 72                                      | M(1)           | Japan (1)                                                                                                             | Klebsiella pneumoniae (1)<br>M. avium complex(1)                                                                                                                                                                                                                                                                                                                                                                                               | Carithromycin, rifampicin, ethambutol                                                                                                     | 49.5 E.U<br>(healthy control of 0.5 E.U) | AIGA positive | Inhibited pSTAT-1<br>pSTAT1 index: 41.8 , control: 365     | None                                             | —         | Bone (1)<br>Lung (1)<br>Kidney(1)                                                                                                                                                                                                    | Death (1)                                                                  |
| 73 | Guo J, 2020 [73]         | 58 | Mean 54<br>(22-77)                      | F(24)<br>M(34) | China (58)                                                                                                            | M. abscessus (2)<br>M. avium complex (1)<br>NTM (4)<br>M. tuberculosis (3)<br>Salmonella spp (4)<br>VZV (8)<br>A. baumannii (1)<br>A. veronii (1)<br>B. cepacia (1)<br>E. cloacae (1)<br>K. pneumoniae (3)<br>Aspergillus spp (1)<br>C. albicans (3)<br>T. marneffeii (55)<br>CMV (3)<br>EBV (2)<br>HBV (3)<br>C. sinensis (1)                                                                                                                 | —                                                                                                                                         | —                                        | AIGA positive | —                                                          | None                                             | —         | Bone (2)<br>Lymph node (6)<br>Lung (21)<br>Skin (12)<br>Blood (14)<br>Liver/biliary tree (1)<br>Joints (2)<br>Bone marrow (4)<br>Pleural (2)                                                                                         | Death (13)<br>Persistent (19)<br>Remission (12)<br>Lost (14)               |
| 74 | Ahmad TR, 2020 [74]      | 1  | 30                                      | F(1)           | America(1)                                                                                                            | M. aviumcomplex (1)                                                                                                                                                                                                                                                                                                                                                                                                                            | Rifabutin, ethambutol, clarithromycin                                                                                                     | —                                        | AIGA positive | —                                                          | Rituximab<br>Methylprednisolone                  | —         | Eye (1)                                                                                                                                                                                                                              | Remission                                                                  |
| 75 | Yamaba Y, 2020 [75]      | 1  | 68                                      | M(1)           | Japan (1)                                                                                                             | M. avium complex (1)                                                                                                                                                                                                                                                                                                                                                                                                                           | Clarithromycin, rifampicin, ethambutol, streptomycin, Sitafloracin                                                                        | 1,210.97 E.U.<br>(control: 1.91 E.U.)    | AIGA positive | Inhibited pSTAT-1<br>pSTAT1 index: 17.76 , control: 556.59 | None                                             | —         | Bone (1)<br>Lung (1)<br>Liver/biliary tree (1)<br>Spleen (1)<br>Abdominal (1)                                                                                                                                                        | Relapse                                                                    |
| 76 | Chaononghin S, 2020 [76] | 1  | 55                                      | M(1)           | Thailand (1)                                                                                                          | M. scrofulaceum (1)                                                                                                                                                                                                                                                                                                                                                                                                                            | Amikacin, rifampicin, ethambutol, clarithromycin, trimethoprim/sulfamethoxazole.                                                          | 1:200,000<br>(reference range <1:100).   | AIGA positive | —                                                          | Rituximab                                        | —         | Blood (1)<br>Lymph node (1)<br>Lung (1)                                                                                                                                                                                              | Remission                                                                  |
| 77 | Keragala BSDP, 2020      | 1  | 24                                      | M(1)           | Sri Lanka (1)                                                                                                         | M. scrofulaceum (1)                                                                                                                                                                                                                                                                                                                                                                                                                            | Isoniazid, rifampicin, pyridoxime, ethambutol, amikacin, imipenem, clarithromycin, ciprofloxacin, larithromycin, ciprofloxacin, linezolid | 1:30000.                                 | AIGA positive | —                                                          | Immunoglobulin                                   | —         | Blood (1)<br>Spleen (1)<br>Intestinal tract(1)                                                                                                                                                                                       | Remission                                                                  |
| 78 | Weng TP, 2020 [78]       | 1  | 71                                      | M(1)           | China (1)                                                                                                             | M. szulgai (1)                                                                                                                                                                                                                                                                                                                                                                                                                                 | Clarithromycin, ethambutol, rifampin                                                                                                      | —                                        | AIGA positive | —                                                          | None                                             | —         | Pleural (1)<br>Lymph node (1)<br>Lung (1)                                                                                                                                                                                            | Remission                                                                  |
| 79 | Liang XN, 2020 [79]      | 1  | 69                                      | M(1)           | China (1)                                                                                                             | Salmonella spp (1)<br>Mycobacterium spp (1)<br>Candida spp (1)<br>Burkholderia cepacia (1)<br>T. marneffeii (1)                                                                                                                                                                                                                                                                                                                                | Moxifloxacin, clarithromycin, sulfamethoxazole, ethambuto                                                                                 | —                                        | AIGA positive | —                                                          | None                                             | —         | Skin (1)<br>Lymph node (1)<br>Lung (1)                                                                                                                                                                                               | Persistent                                                                 |
|    |                          |    | 35                                      | F(1)           | Thailand (1)                                                                                                          | M. avium complex (1)<br>M. fortuitum (1)                                                                                                                                                                                                                                                                                                                                                                                                       | —                                                                                                                                         | —                                        | AIGA positive | —                                                          | Cyclophosphamide                                 | Decreased | —                                                                                                                                                                                                                                    | Remission                                                                  |
|    |                          |    | 59                                      | M(1)           | Thailand (1)                                                                                                          | M. kansasii (1)<br>Salmonella spp (1)<br>HSV (1)<br>Cryptococcus spp (1)                                                                                                                                                                                                                                                                                                                                                                       | —                                                                                                                                         | —                                        | AIGA positive | —                                                          | Cyclophosphamide                                 | Decreased | —                                                                                                                                                                                                                                    | Remission                                                                  |
|    |                          |    | 56                                      | F(1)           | Thailand (1)                                                                                                          | NTM (1)                                                                                                                                                                                                                                                                                                                                                                                                                                        | —                                                                                                                                         | —                                        | AIGA positive | —                                                          | Cyclophosphamide                                 | Decreased | —                                                                                                                                                                                                                                    | Remission                                                                  |

|    |                        |              |                    |      |                 |                                                                                                          |                                                                                                 |                                           |               |                   |                         |                        |                                                                 |            |
|----|------------------------|--------------|--------------------|------|-----------------|----------------------------------------------------------------------------------------------------------|-------------------------------------------------------------------------------------------------|-------------------------------------------|---------------|-------------------|-------------------------|------------------------|-----------------------------------------------------------------|------------|
| 80 | Laisuan W, 2020 [80]   | 17           | 59                 | M(1) | Thailand (1)    | M. abscessus (1)<br>HZV (1)                                                                              | —                                                                                               | —                                         | AIGA positive | —                 | Cyclophosphamide        | Decreased              | —                                                               | Remission  |
|    |                        |              | 40                 | M(1) | Thailand (1)    | M. abscessus (1)                                                                                         | —                                                                                               | —                                         | AIGA positive | —                 | Cyclophosphamide        | Decreased              | —                                                               | Remission  |
|    |                        |              | 47                 | F(1) | Thailand (1)    | M. manteneii (1)<br>Cryptococcus spp. (1)                                                                | —                                                                                               | —                                         | AIGA positive | —                 | Cyclophosphamide        | Decreased              | —                                                               | Remission  |
|    |                        |              | 45                 | F(1) | Thailand (1)    | M. parascocula ceum (1)<br>M. abscessus (1)                                                              | —                                                                                               | —                                         | AIGA positive | —                 | Cyclophosphamide        | Decreased              | —                                                               | Remission  |
|    |                        |              | 62                 | M(1) | Thailand (1)    | M. abscessus (1)<br>Salmonella spp (1)<br>HSV (1)<br>Cryptococcus spp (1)                                | —                                                                                               | —                                         | AIGA positive | —                 | Cyclophosphamide        | Decreased              | —                                                               | Remission  |
|    |                        |              | 46                 | M(1) | Thailand (1)    | M. abscessus (1)                                                                                         | —                                                                                               | —                                         | AIGA positive | —                 | Cyclophosphamide        | Decreased              | —                                                               | Remission  |
|    |                        |              | 52                 | M(1) | Thailand (1)    | Cryptococcus spp (1)<br>Cytomegalovirus (1)                                                              | —                                                                                               | —                                         | AIGA positive | —                 | Cyclophosphamide        | Decreased              | —                                                               | Remission  |
|    |                        |              | 64                 | M(1) | Thailand (1)    | M. fortuitum (1)<br>Salmonella spp (1)                                                                   | —                                                                                               | —                                         | AIGA positive | —                 | Cyclophosphamide        | Decreased              | —                                                               | Remission  |
|    |                        |              | 66                 | F(1) | Thailand (1)    | Salmonella spp (1)<br>HSV (1)<br>HZV (1)                                                                 | —                                                                                               | —                                         | AIGA positive | —                 | Rituximab               | Decreased              | —                                                               | Remission  |
|    |                        |              | 48                 | F(1) | Thailand (1)    | M. avium complex (1)                                                                                     | —                                                                                               | —                                         | AIGA positive | —                 | Rituximab               | Decreased              | —                                                               | Remission  |
|    |                        |              | 44                 | F(1) | Thailand (1)    | M. szulgai (1)<br>M. angelicum (1)                                                                       | —                                                                                               | —                                         | AIGA positive | —                 | Rituximab               | Decreased              | —                                                               | Remission  |
|    |                        |              | 79                 | F(1) | Thailand (1)    | M. avium (1)<br>M. avium complex (1)                                                                     | —                                                                                               | —                                         | AIGA positive | —                 | Rituximab               | Decreased              | —                                                               | Remission  |
|    |                        |              | 51                 | M(1) | Thailand (1)    | M. avium complex (1)                                                                                     | —                                                                                               | —                                         | AIGA positive | —                 | Rituximab               | Decreased              | —                                                               | Remission  |
| 62 | M(1)                   | Thailand (1) | Salmonella spp (1) | —    | —               | AIGA positive                                                                                            | —                                                                                               | Rituximab                                 | Decreased     | —                 | Remission               |                        |                                                                 |            |
| 81 | Roerden M, 2020 [81]   | 1            | 44                 | F(1) | Asian (1)       | Cytomegalovirus (1)<br>Salmonella spp (1)<br>M. intracellulare(1)<br>M. abscessusandgoodii(1)            | Azithromycin, rifabutin, ethambutol, valganciclovir, cefuroxime                                 | —                                         | AIGA positive | —                 | Rituximab               | Decreased              | Skin (1)<br>Lymph node (1)<br>Lung (1)<br>Digestive system (1)  | Remission  |
| 82 | Liang X, 2020 [82]     | 1            | 47                 | F(1) | China (1)       | T. marneffeii(1)<br>NTM(1)                                                                               | Amphotericin B and Itraconazole for T. marneffeii;<br>Clarithromycin and moxifloxacin           | —                                         | AIGA positive | —                 | None                    | —                      | Skin (1)<br>Lymph node (1)<br>Lung (1)<br>Bone (1)              | Relapse    |
| 83 | Loh KM, 2020 [83]      | 10           | —                  | —    | Singapore(1)    | NTM (9)<br>Salmonella spp (2)<br>M. tuberculosis (1)                                                     | —                                                                                               | —                                         | AIGA positive | —                 | None                    | —                      | —                                                               | Unknown    |
| 84 | Rocco JM, 2021 [84]    | 1            | 38                 | F(1) | Philippines (1) | M. avium complex (1)<br>M. intracellulare (1)                                                            | Azithromycin, ethambutol, amikacin,rifampin, linezolid                                          | —                                         | AIGA positive | Inhibited pSTAT-1 | Rituximab<br>Bortezomib | Decreased              | Skin (1)<br>Lymph node (1)<br>Muscle (1)<br>Bone (1)            | Relapse    |
| 85 | Tham EH, 2016 [85]     | 3            | 46                 | F(1) | Thailand (1)    | M. kansasii (1)<br>Aspergillosis (1)                                                                     | —                                                                                               | —                                         | AIGA positive | Inhibited pSTAT-1 | None                    | —                      | Bone (1)                                                        | Persistent |
|    |                        |              | 45                 | F(1) | China (1)       | M. avium complex (1)<br>M. kansasii(1)<br>M. haemophilum (1)<br>Salmonella spp (1)<br>Cytomegalovirus(1) | —                                                                                               | —                                         | AIGA positive | Inhibited pSTAT-1 | None                    | —                      | Skin (1)<br>Lung (1)<br>Bone (1)                                | Relapse    |
|    |                        |              | 63                 | M(1) | Malaysia (1)    | M. kansasii (1)<br>Staphylococcus aureus (1)<br>Pseudomonas aeruginosa (1)                               | —                                                                                               | —                                         | AIGA positive | Inhibited pSTAT-1 | None                    | —                      | Spleen (1)<br>Lung (1)<br>Bone (1)                              | Remission  |
| 86 | Jin W, 2021 [86]       | 1            | 68                 | M(1) | China (1)       | T. marneffeii (1)<br>M. abscessus (1)                                                                    | Voriconazole, Itraconazole; Clarithromycin and moxifloxacin                                     | 1:500.                                    | AIGA positive | —                 | None                    | —                      | Lymph node (1)<br>Lung (1)                                      | Remission  |
| 87 | Ochoa S, 2021 [87]     | 1            | 31                 | F(1) | Philippines (1) | M. avium (1)                                                                                             | zithromycin, ethambutol, tedizolid, moxifloxacin, clofazimine                                   | 1521 mg/dL                                | AIGA positive | Inhibited pSTAT-1 | Rituximab<br>Bortezomib | Decrease to 1069 mg/dL | Lung (1)<br>Lymph node (1)<br>Muscle (1)<br>Bone (1)            | Remission  |
| 88 | Mochizuka Y, 2021 [88] | 1            | 78                 | M(1) | Japan (1)       | M. avium (1)                                                                                             | Rifampicin, ethambutol, clarithromycin, streptomycin                                            | 427.8 E.U.<br>(control: 26.4 E.U.)        | AIGA positive | Inhibited pSTAT-1 | None                    | —                      | Lung (1)<br>Lymph node (1)<br>Pleural (1)<br>Bone (1)           | Remission  |
| 89 | Uno S, 2021 [89]       | 1            | 77                 | M(1) | Japan (1)       | M. avium (1)                                                                                             | larithromycin, rifampicin, ethambutol, and sitafloxacin                                         | —                                         | AIGA positive | Inhibited pSTAT-1 | R-CHOP                  | Decrease               | Liver (1)<br>Lymph node (1)<br>Intestinal tract (1)<br>Bone (1) | Remission  |
| 90 | Harada M, 2021 [90]    | 1            | 65                 | M(1) | Japan (1)       | M. avium (1)                                                                                             | Clarithromycin, rifampicin, and ethambutol, azithromycin, streptomycin, moxifloxacin, Rifabutin | 63.5 ELISA unit (E.U.) (cutoff: 0.2 E.U.) | AIGA positive | Inhibited pSTAT-1 | Recombinant IFN-γ       | Not decrease           | Lymph node (1)<br>Skin (1)<br>Bone (1)                          | Persistent |

|    |                    |   |                      |              |                                                                    |                                                                                              |                                                                                          |                                |               |                   |           |   |                                                                 |            |
|----|--------------------|---|----------------------|--------------|--------------------------------------------------------------------|----------------------------------------------------------------------------------------------|------------------------------------------------------------------------------------------|--------------------------------|---------------|-------------------|-----------|---|-----------------------------------------------------------------|------------|
| 91 | Thapa P, 2021 [91] | 1 | 63                   | M(1)         | Laos(1)                                                            | M. abscessus (1)<br>M. chelonae (1)                                                          | Amikacin, imipenem, tigecycline, clofazimine,                                            | —                              | AIGA positive | —                 | None      | — | Lymph node (1)<br>Skin (1)<br>Bone (1)<br>Lung                  | Remission  |
| 92 | Zeng W, 2021 [92]  | 1 | 49                   | M(1)         | China (1)                                                          | T. marneffeii (1)<br>Burkholderia cepacia (1)                                                | Ceftazidime and levofloxacin; Amphotericin B                                             | 50,566 ng/mL                   | AIGA positive | Inhibited pSTAT-1 | None      | — | Lymph node (1)<br>Skin (1)<br>Bone (1)<br>Lung                  | Persistent |
| 93 | King EM, 2021 [93] | 3 | 44                   | F(1)         | Philippines (1)                                                    | M. avium complex (1)                                                                         | Azithromycin, ethambutol, and rifabutin. Persistent                                      | 19071<br>fluorescent intensity | AIGA positive | —                 | Rituximab | — | Lung (1)<br>Liver (1)<br>Lymph nodes (1)<br>Bone marrow (1)     | Remission  |
|    |                    |   | 53                   | F(1)         | Cambodia(1)                                                        | M. avium complex (1)                                                                         | Azithromycin, rifampin, amikacin, moxifloxacin;<br>Persistent                            | 19934<br>fluorescent intensity | AIGA positive | —                 | Rituximab | — | Abdominal (1)<br>Lymph nodes (1)                                | Remission  |
|    |                    |   | 53                   | M(1)         | Philippines (1)                                                    | Salmonella spp (1)<br>M. avium complex (1)<br>M. abscessus (1)<br>Massiliense (1)<br>VZV (1) | Azithromycin, rifabutin, ethambutol, moxifloxacin;<br>Persistent                         | 18278<br>fluorescent intensity | AIGA positive | —                 | Rituximab | — | Lung (1)<br>Lymph nodes (1)<br>Bone (1)<br>Blood (1)            | Remission  |
| 94 | Puel A, 2013 [94]  | 5 | Median 46<br>(25,59) | F(3)<br>M(2) | Thailand (1)<br>Philippines (1)<br>British (2)<br>South African(1) | M. tuberculosis (5)                                                                          | —                                                                                        | —                              | AIGA positive | —                 | None      | — | —                                                               | Unknown    |
| 95 | Imoto W, 2020 [95] | 1 | 55                   | F(1)         | Japan (1)                                                          | M. tuberculosis (1)<br>M. fortuitum(1)<br>M. abscessus(1)                                    | Azithromycin, imipenem/cilastatin, levofloxacin,<br>minocycline, linezolid, sitafloxacin | —                              | AIGA positive | —                 | None      | — | Lung (1)<br>Lymph nodes (1)<br>Eye (1)                          | Death (1)  |
| 96 | Dahl VN, 2021 [96] | 1 | 71                   | F(1)         | Thailand (1)                                                       | M. avium complex (1)<br>Salmonella spp (1)<br>HSV (1)                                        | Rifampicin, ethambutol, clarithromycin, amikacin                                         | —                              | AIGA positive | Inhibited pSTAT-1 | None      | — | Lung (1)<br>Lymph nodes (1)<br>Blood (1)<br>intestinal tract(1) | Persistent |

| <b>Organs involvement</b>     | <b>Number</b> | <b>Percentage</b> |
|-------------------------------|---------------|-------------------|
| <b>Lymph nodes</b>            | <b>442</b>    | <b>63.14%</b>     |
| <b>Lung</b>                   | <b>285</b>    | <b>40.71%</b>     |
| <b>Bone</b>                   | <b>231</b>    | <b>33.00%</b>     |
| <b>Skin</b>                   | <b>197</b>    | <b>28.14%</b>     |
| <b>Bloodstream</b>            | <b>131</b>    | <b>18.71%</b>     |
| <b>Liver</b>                  | <b>69</b>     | <b>9.86%</b>      |
| <b>Bone marrow</b>            | <b>58</b>     | <b>8.29%</b>      |
| <b>Spleen</b>                 | <b>47</b>     | <b>6.71%</b>      |
| <b>Joint</b>                  | <b>35</b>     | <b>5.00%</b>      |
| <b>Pleural cavity</b>         | <b>33</b>     | <b>4.71%</b>      |
| <b>Central nervous system</b> | <b>32</b>     | <b>4.57%</b>      |
| <b>Muscle</b>                 | <b>18</b>     | <b>2.57%</b>      |
| <b>Pericardium</b>            | <b>13</b>     | <b>1.86%</b>      |
| <b>Abdominal cavity</b>       | <b>12</b>     | <b>1.71%</b>      |
| <b>Urogenital system</b>      | <b>12</b>     | <b>1.71%</b>      |
| <b>Gastrointestinal tract</b> | <b>10</b>     | <b>1.43%</b>      |
| <b>Sinus</b>                  | <b>10</b>     | <b>1.43%</b>      |
| <b>Soft tissue</b>            | <b>9</b>      | <b>1.29%</b>      |
| <b>Eyes</b>                   | <b>8</b>      | <b>1.14%</b>      |
| <b>Pharynx</b>                | <b>4</b>      | <b>0.57%</b>      |
| <b>Tonsils</b>                | <b>3</b>      | <b>0.43%</b>      |
| <b>Lacrimal gland</b>         | <b>2</b>      | <b>0.29%</b>      |
| <b>Pancreas</b>               | <b>2</b>      | <b>0.29%</b>      |
| <b>Parotid gland</b>          | <b>2</b>      | <b>0.29%</b>      |
| <b>Appendix</b>               | <b>1</b>      | <b>0.14%</b>      |
| <b>Breast</b>                 | <b>1</b>      | <b>0.14%</b>      |
| <b>Cholecyst</b>              | <b>1</b>      | <b>0.14%</b>      |
| <b>Cardiac valve</b>          | <b>1</b>      | <b>0.14%</b>      |
